1 **Impact of energy limitations on function and resilience in long-wavelength Photosystem II**

2 *Stefania Viola<sup>a\*</sup>, William Roseby<sup>a</sup>, Stefano Santabarabara<sup>b#</sup>, Dennis Nürnberg<sup>c</sup>, Ricardo Assunção<sup>c</sup>,*  
3 *Holger Dau<sup>c</sup>, Julien Sellés<sup>d</sup>, Alain Boussac<sup>e</sup>, Andrea Fantuzzi<sup>a</sup>, A William Rutherford<sup>a\*</sup>*

4

5 <sup>a</sup>Department of Life Sciences, Imperial College, SW7 2AZ London, UK

6 <sup>b</sup>Photosynthesis Research Unit, Consiglio Nazionale delle Ricerche, 20133 Milano, Italy

7 <sup>c</sup>Physics Department, Freie Universität Berlin, 14195 Berlin, Germany

8 <sup>d</sup>Institut de Biologie Physico-Chimique, UMR CNRS 7141 and Sorbonne Université, 75005 Paris,  
9 France

10 <sup>e</sup>Institut de Biologie Intégrative de la Cellule, UMR9198, CEA Saclay, 91191 Gif-Sur-Yvette, France

11

12 \*Corresponding Authors:

13 A.W. Rutherford, Department of Life Sciences, Imperial College London, London SW7 2AZ, UK, Tel  
14 +44 2075945329

15 **E-mail:** [a.rutherford@imperial.ac.uk](mailto:a.rutherford@imperial.ac.uk)

16 S. Viola, Department of Life Sciences, Imperial College London, London SW7 2AZ, UK, Tel +44  
17 2075941778

18 **E-mail:** [s.viola@imperial.ac.uk](mailto:s.viola@imperial.ac.uk)

19

20 **#present address:** Istituto di Biologia e Biotecnologia Agraria, Consiglio Nazionale delle Ricerche,  
21 20133, Milan, Italy

22

23 **Keywords:** Photosystem II, electron transfer, chlorophyll, cyanobacteria

24

25 **Abstract**

26 Photosystem II (PSII) uses the energy from red light to split water and reduce quinone, an energy-  
27 demanding process based on chlorophyll a (Chl-a) photochemistry. Two kinds of cyanobacterial PSII  
28 can use Chl-d and Chl-f to perform the same reactions using lower energy, far-red light. PSII from  
29 *Acaryochloris marina* has Chl-d replacing all but one of its 35 Chl-a, while PSII from  
30 *Chroococcidiopsis thermalis*, a facultative far-red species, has just 4 Chl-f and 1 Chl-d and 30 Chl-a.  
31 From bioenergetic considerations, the far-red PSII were predicted to lose photochemical efficiency  
32 and/or resilience to photodamage. Here, we compare enzyme turnover efficiency, forward electron  
33 transfer, back-reactions and photodamage in Chl-f-PSII, Chl-d-PSII and Chl-a-PSII. We show that: i)  
34 all types of PSII have a comparable efficiency in enzyme turnover; ii) the modified energy gaps on the  
35 acceptor side of Chl-d-PSII favor recombination via  $P_{D1}^+Phe^-$  repopulation, leading to increased singlet  
36 oxygen production and greater sensitivity to high-light damage compared to Chl-a-PSII and Chl-f-PSII;  
37 ii) the acceptor-side energy gaps in Chl-f-PSII are tuned to avoid harmful back reactions, favoring  
38 resilience to photodamage over efficiency of light usage. The results are explained by the differences  
39 in the redox tuning of the electron transfer cofactors Phe and  $Q_A$  and in the number and layout of the  
40 chlorophylls that share the excitation energy with the primary electron donor. PSII has adapted to lower  
41 energy in two distinct ways, each appropriate for its specific environment but with different functional  
42 penalties.

43

44

45

46

47

48

49

50

51

52

53

54

55

## 56 1 – Introduction

57 Photosystem II (PSII) is the water/plastoquinone photo-oxidoreductase, the key energy converting  
58 enzyme in oxygenic photosynthesis. Standard PSII contains 35 chlorophylls a (Chl-a) and 2 pheophytins  
59 (Phe). Four of the Chl molecules ( $P_{D1}$ ,  $P_{D2}$ ,  $Chl_{D1}$  and  $Chl_{D2}$ ) and both Phe molecules are located in the  
60 reaction center (1). The remaining 31 Chl-a in the PSII core constitute a peripheral light-collecting  
61 antenna. When antenna chlorophylls are excited by absorbing a photon, they transfer the excitation  
62 energy to the primary electron donor,  $Chl_{D1}$ , the red-most chlorophyll in the reaction center, although  
63 it's been reported that charge separation from  $P_{D1}$  can occur in a fraction of centers (1–4). The initial  
64 charge separation, forming the first radical pair  $Chl_{D1}^+Phe^-$  (assuming  $Chl_{D1}$  as primary donor), is  
65 quickly stabilized by the formation of the second radical pair,  $P_{D1}^+Phe^-$ , and then by further electron  
66 transfer steps (Fig. 1A) that lead to the reduction of plastoquinone and the oxidation of water.

67 PSII activity is energy demanding. In Chl-a-PSII, the primary donor absorbs red photons at 680 nm,  
68 and this defines the energy available for photochemistry (1.82 eV) with a high quantum yield for the  
69 forward reactions. The energy stored in the products of the reaction and in the electrochemical gradient  
70 is ~1 eV, while the remaining ~0.82 eV is released as heat helping to ensure a high quantum yield for  
71 the forward reaction and minimize damaging and wasteful side and back reactions. The 1.82 eV was  
72 suggested to be the minimum amount of energy required for an optimum balance of efficiency versus  
73 resilience to photodamage, and responsible for explaining the “red limit” (~680 nm) for oxygenic  
74 photosynthesis (5, 6).

75 The first reported case in which the red limit is exceeded was the Chl-d-containing cyanobacterium  
76 *Acaryochloris marina* (*A. marina*) (7). Chl-d-PSII contains 34 Chl-d and 1 Chl-a (proposed to be in the  
77  $P_{D1}$  position (8)) and uses less energy, with the proposed Chl-d primary donor in the  $Chl_{D1}$  position  
78 absorbing far-red photons at ~720 nm (9), corresponding to an energy of ~1.72 eV (Fig. 1B).

79 Recently, it was discovered that certain cyanobacteria use an even more red-shifted pigment, Chl-f, in  
80 combination with Chl-a (10, 11). When grown in far-red light, these cyanobacteria replace their standard  
81 Chl-a-PSII with Chl-f-PSII, that has far-red specific variants of the core protein subunits (D1, D2, CP43,  
82 CP47 and PsbH) and contains ~90% of Chl-a and ~10% of Chl-f (5, 11). The Chl-f-PSII from  
83 *Chroococidiopsis thermalis* PCC7203 (*C. thermalis*), which contains 30 Chl-a, 4 Chl-f and 1 Chl-d,  
84 was shown to have a long wavelength primary donor (either Chl-f or d, in the  $Chl_{D1}$  position) absorbing  
85 far-red photons at ~720 nm (Fig. 1C), the same wavelength as in *A. marina* (5, 12). A recent cryo-EM  
86 structure has also argued for  $Chl_{D1}$  being the single Chl-d in the far-red PSII of *Synechococcus elongatus*  
87 PCC7335 (13). The facultative, long-wavelength species that use Chl-f are thus the second case of  
88 oxygenic photosynthesis functioning beyond the red-limit (5), but the layout of their long wavelength  
89 pigments is quite different from that of the Chl-d-PSII.

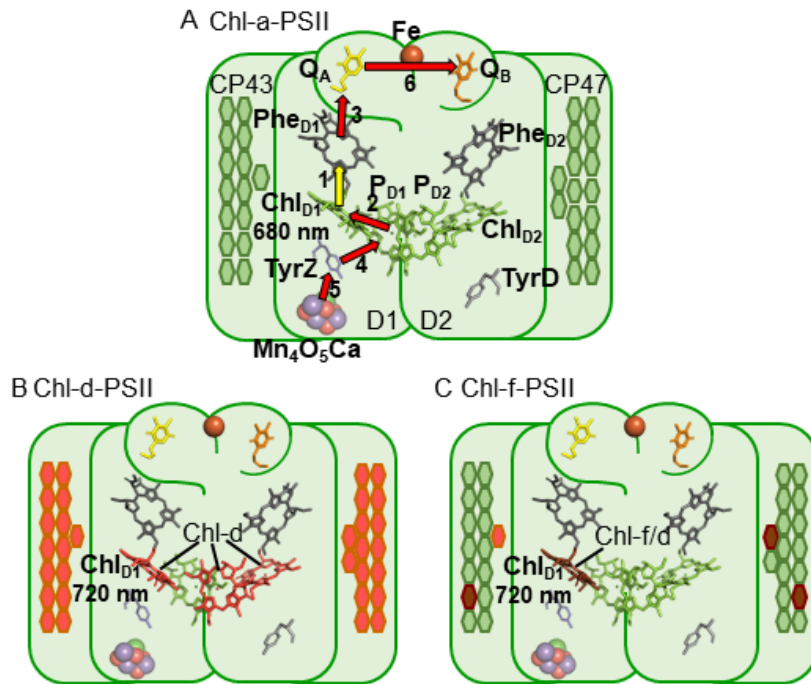

90

91 Fig. 1. The three types of PSII. (A) Chl-a-PSII (PDB ID: 3ARC, (14)) with the key cofactors of the reaction center,  
92 located in the subunits D1 and D2, labelled. Besides the P<sub>D1</sub>, P<sub>D2</sub>, Chl<sub>D1</sub> and Chl<sub>D2</sub> chlorophylls and the two  
93 pheophytins, Phe<sub>D1</sub> and Phe<sub>D2</sub>, these cofactors include the quinones, Q<sub>A</sub> and Q<sub>B</sub>, and the non-heme iron (Fe) on  
94 the acceptor side and the two redox-active tyrosines TyrZ and TyrD and the manganese cluster (Mn<sub>4</sub>O<sub>5</sub>Ca) on the  
95 donor side. The arrows represent the electron transfer steps and the numbers the order of the steps. The yellow  
96 arrow is the primary charge separation, with other steps shown as red arrows. The primary donor is shown as  
97 Chl<sub>D1</sub>. (B) and (C) Chl-d-PSII and Chl-f-PSII, with the far-red chlorophylls in the reaction centers highlighted and the  
98 wavelength of the primary donor, assumed to be Chl<sub>D1</sub>, indicated. The hexagons on the sides of each reaction  
99 center represent the chlorophylls of the respective antennas, located in the subunits CP43 and CP47. Chl-a is  
100 represented in green, Chl-d in orange and Chl-f in brown. In (C) the single Chl-d is located in the antenna, but the  
101 possibility that it is located in the Chl<sub>D1</sub> position and plays the primary donor role also exists (5, 13) and the  
102 locations of the 4 antenna in the peripheral antenna are uncertain but reflect suggestions in the literature (6).

103 Assuming that Chl-a-PSII already functions at an energy red limit (6), the diminished energy in Chl-d-  
104 PSII and Chl-f-PSII seems likely to increase the energetic constraints. Thus, if the far-red PSII variants  
105 store the same amount of energy in their products and electrochemical gradient, as seems likely, then it  
106 was suggested that they should have decreased photochemical efficiency and/or a loss of resilience to  
107 photodamage (5, 15, 16). These predicted energetic constraints are worth investigating to generate  
108 knowledge that could be beneficial for designing strategies aimed at engineering of far-red  
109 photosynthesis into other organisms of agricultural or technological interest (17).

110 Here we report a comparison of the enzyme turnover efficiency, forward reactions, and back-reactions  
111 in the three known types of PSII: the “standard” Chl-a-PSII, and the two far-red types, the Chl-f-PSII

112 from *C. thermalis* and the Chl-d-PSII from *A. marina*. To compare the enzymatic properties of the three  
113 types of PSII and minimize the effects of physiological differences between strains, isolated membranes  
114 rather than intact cells were used. The use of isolated membranes allows the minimization of potential  
115 effects due to: i) the transmembrane electric field, which affects forward electron transfer (18) and  
116 charge recombination (19), ii) the uncontrolled redox state of the plastoquinone pool in whole cells, ,  
117 which can affect the  $Q_B/Q_B^-$  ratio present in dark-adapted PSII, iii) differences in the size and  
118 composition of the phycobilisomes and in their association with PSII, and iv) the presence of  
119 photoprotective mechanisms such as excitation energy quenching and scavengers of reactive oxygen  
120 species.

## 121 2 - Results

### 122 2.1 - Fluorescence decay kinetics in the three types of PSII

123 The electron transfer properties of the three types of PSII were investigated by comparing the decay  
124 kinetics of the flash-induced fluorescence in membranes from *A. marina*, white-light (WL) grown *C.*  
125 *thermalis* and far-red-light (FR) grown *C. thermalis*. When forward electron transfer occurs (Fig. 2A),  
126 the fluorescence decay comprises three phases (20, 21): the fast phase ( $\sim 0.5$  ms) is attributed to electron  
127 transfer from  $Q_A^-$  to  $Q_B$  or  $Q_B^-$  and the middle phase ( $\sim 3$  ms) is generally attributed to  $Q_A^-$  oxidation  
128 limited by plastoquinone (PQ) entry to an initially empty  $Q_B$  site and/or by  $Q_BH_2$  exiting the site prior  
129 to PQ entry (22). These two phases had comparable time-constants in all samples ( $T_1 = 0.5-0.6$  and  $T_2$   
130  $= 3.5-5$  ms, Table S1). The fast electron transfer from  $Q_A^-$  to the non-heme iron possibly oxidized in a  
131 fraction of centers is too fast ( $t_{1/2} \sim 50$   $\mu$ s) to be detected here.

132 The slower decay phase is attributed to the charge recombination between  $Q_A^-$  and the the Mn cluster  
133 in the  $S_2$  state in centers where forward electron transfer to  $Q_B/Q_B^-$  did not occur. This phase was  
134 significantly slower in FR *C. thermalis* ( $T_3 = 14.3 \pm 4.6$  s) than in WL *C. thermalis* ( $T_3 = 5.6 \pm 2.4$  s) but  
135 had a similar amplitude in the two samples (Fig. S1 and Table S2). In *A. marina* this phase had a bigger  
136 amplitude than in the two *C. thermalis* samples (Tables S1 and S2), because it was superimposed to a  
137 non-decaying component of the fluorescence, that did not return to the original  $F_0$  level even at 100 s  
138 after the flash (Fig. S1). This non-decaying component, absent in the two *C. thermalis* samples, is  
139 attributed to centers without a functional Mn-cluster, in which  $P_{D1}^+$  is reduced by an electron donor that  
140 does not recombine in the minutes timescale (such as  $Mn^{2+}$ , TyrD, or the ChlZ/Car side-path), with the  
141 consequence of stabilizing  $Q_A^-$  (23, 24). The fluorescence decay arising from the  $S_2Q_A^-$  recombination  
142 was slower in *A. marina* ( $T_3 = 10.8 \pm 2.6$  s) than in WL *C. thermalis*, but its overlap with the non-  
143 non-decaying component made the fit of its time-constant potentially less reliable.

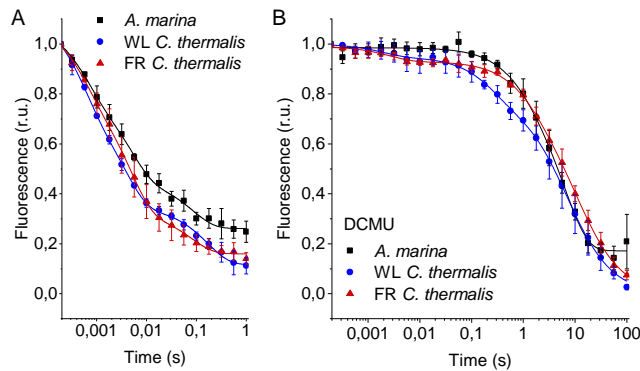

144

145 Fig. 2. Fluorescence decay kinetics after a saturating flash in membranes of *A. marina*, WL *C. thermalis* and FR *C.*  
146 *thermalis* with no additions (A) and in presence of DCMU (B). The datapoints represent the averages of three  
147 biological replicates,  $\pm$  s.d., the lines represent the fits of the experimental data. All traces are normalized on the  
148 initial variable fluorescence ( $F_m - F_0$ , with  $F_m$  measured 190  $\mu$ s after the saturating flash). The full 100 s traces of the  
149 data in (A) are shown in Fig. S1.

150 Indeed, when the fluorescence decay due to the  $S_2Q_A^-$  recombination was measured in presence of the  
151  $Q_B$ -site inhibitor DCMU (Fig. 2B), the decay kinetics were bi-phasic in all samples, and no difference  
152 in the two  $S_2Q_A^-$  recombination phases (middle and slow phase in Table S1) was found between *A.*  
153 *marina* and WL *C. thermalis*. In contrast, the decay was significantly slower in FR *C. thermalis*, with  
154 the time-constant of the major  $S_2Q_A^-$  recombination phase (slow phase in Table S1,  $\sim 80\%$  amplitude,  
155  $T_3 = 10.4 \pm 0.8$  s) similar to that measured in the absence of DCMU (Table S2). The fluorescence decay  
156 in WL and FR *C. thermalis* both had an additional fast phase of small amplitude (5-6%), attributed to  
157 forward electron transfer in centers in which DCMU was not bound (25). Again, the *A. marina* traces  
158 included a non-decaying phase of fluorescence, attributed to centers lacking an intact Mn-cluster.

159 The fluorescence decay kinetics in membranes of *Synechocystis* sp. PCC6803 (*Synechocystis*), perhaps  
160 the best studied Chl-a containing cyanobacterium, were also measured as an additional control. The  
161 kinetics in *Synechocystis* membranes were comparable to those reported for WL *C. thermalis* (Fig. S2).  
162 The *Synechocystis* and *A. marina* fluorescence decay kinetics measured in membranes here are overall  
163 slower than those previously measured in cells (26). This difference is ascribed to pH and membrane  
164 potential effects, as discussed in the Supplementary Information, and illustrates the difficulty to use  
165 whole cells for such measurements

166 To conclude, the forward electron transfer rates from  $Q_A^-$  to  $Q_B/Q_B^-$  are not significantly different in the  
167 three types of PSII. In contrast, the  $S_2Q_A^-$  recombination is slower in Chl-f-PSII of FR *C. thermalis*  
168 compared to Chl-a-PSII of WL *C. thermalis* and Chl-d-PSII of *A. marina*.

169

170

## 171 2.2 - S-state turnover efficiency in the far-red PSII

172 The efficiency of PSII activity can be estimated by the flash-dependent progression through the S-states.  
 173 This can be measured by thermoluminescence (TL), which arises from radiative recombination of the  
 174  $S_2Q_B^-$  and  $S_3Q_B^-$  states (27). The TL measured in *A. marina*, WL *C. thermalis* and FR *C. thermalis*  
 175 membranes showed similar flash-dependencies in all three types of PSII (Fig. S3), confirming and  
 176 extending the earlier report (5). Because the TL data presented some variability between biological  
 177 replicates (see Fig. S3 and associated text), additional analyses were performed by polarography and  
 178 absorption spectroscopy.

179 Fig. 3 shows the flash-dependent oxygen evolution measured in *A. marina*, FR *C. thermalis* and  
 180 *Synechocystis* membranes. The latter were used as a Chl-a-PSII control because the content of PSII in  
 181 membranes of WL *C. thermalis* was too low to allow accurate  $O_2$  polarography measurements. As  
 182 shown by fluorescence (Fig. S2), no significant difference in forward electron transfer between the two  
 183 types of Chl-a-PSII was observed, and the use of *Synechocystis* membranes was therefore considered  
 184 as a valid control.

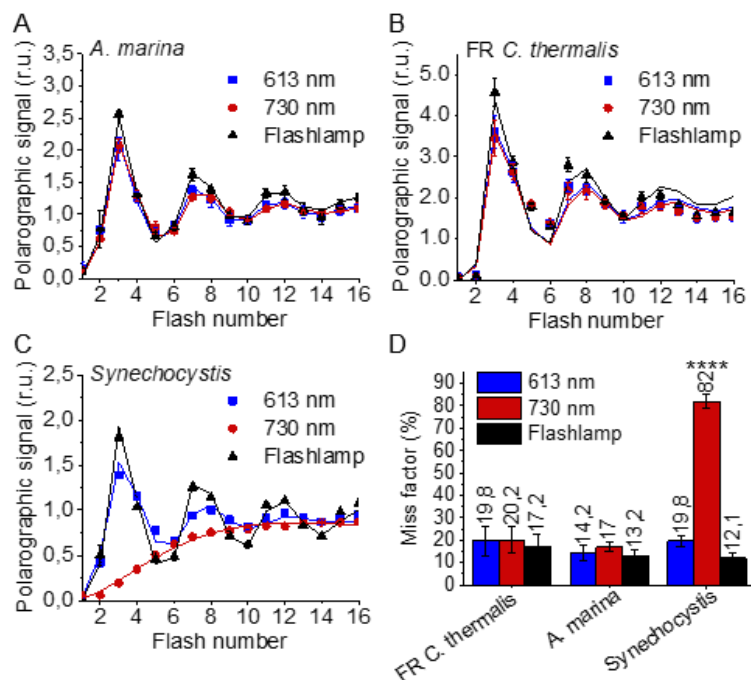

185  
 186 Fig. 3. Flash-induced release of  $O_2$  measured by polarography. (A-C) Patterns of oxygen release in *A. marina*, FR  
 187 *C. thermalis* and *Synechocystis* membranes. Flashes were given at 900 ms intervals and the  $O_2$  produced after  
 188 each flash was measured. Flashes were provided by a white xenon flash lamp, a red LED centered at 613 nm, and  
 189 a far-red LED centered at 730 nm. The data represent the averages of 3 biological replicates  $\pm$ s.d. The lines  
 190 represent the fits of the experimental data. (D) Miss factors (in %) calculated from the data shown in (A-C). The  
 191 miss factor in *Synechocystis* membranes flashed at 730 nm is significantly higher than in *A. marina* and FR *C.*  
 192 *thermalis* membranes according to Student's t-test, as indicated with asterisks (\*\*\*\* $p \leq 0.0001$ ).

193 The measurements were performed using white, red, and far-red flashes. As expected, in dark-adapted  
194 samples, with  $S_1$  as the majority state, the maximal  $O_2$  evolution occurred on the 3<sup>rd</sup> flash with  
195 subsequent maxima at 4 flash intervals. These maxima reflect the occurrence of the  $S_3YZ^{\bullet}/S_4$  to  $S_0$   
196 transition in most centers as two water molecules are oxidized, resulting in the release of  $O_2$ . This  
197 oscillation pattern was the same in all samples and under all excitation conditions, except in  
198 *Synechocystis* membranes illuminated with far-red light, where the slow rise in  $O_2$  evolution is due to  
199 the weak excitation of Chl-a-PSII by the short wavelength tail of the 730 nm flash.

200 The miss factor (Fig. 3D) was  $\leq 20\%$  in all the samples except in the *Synechocystis* sample illuminated  
201 with far-red flashes ( $>80\%$ ). For *A. marina*, the misses (13-17%) were very similar to those reported  
202 earlier (28). The misses in FR *C. thermalis* and in *Synechocystis* when illuminated with the 613 nm  
203 LED were slightly higher (17-20%). Nevertheless, these differences, attributed to the combination of  
204 the absence of exogenous electron acceptors, and the relatively long and possibly not fully saturating  
205 flashes, were not significant.

206 In order to confirm and expand the results obtained with polarography, we measured the S-state turnover  
207 as the flash-induced absorption changes at 291 nm (Fig. 4), that reflect the redox state of the Mn ions  
208 in the oxygen evolving complex (29). These measurements were done in the presence of the electron  
209 acceptor PPBQ and using single-turnover monochromatic saturating laser flashes. In the case of *A.*  
210 *marina*, the measurements could be done using membranes, but the membranes of WL and FR *C.*  
211 *thermalis* could not be used because of their high light-scattering properties in the UV part of the  
212 spectrum. In the case of the FR *C. thermalis* partially purified  $O_2$  evolving Chl-f-PSII were made and  
213 used for the measurements, while difficulties were encountered in isolating  $O_2$  evolving PSII from WL  
214 *C. thermalis*. Therefore, PSII cores from *T. elongatus* with the D1 isoform PsbA3, which has the highest  
215 sequence identity with the D1 of Chl-f-PSII in FR *C. thermalis* (see discussion), were used as a Chl-a-  
216 PSII control (30).

217 The Chl-f-PSII was illuminated with flashes at wavelengths preferentially absorbed by Chl-a (680 nm)  
218 and of the long-wavelength chlorophylls (720 to 750 nm) (Fig. 4A). As expected, maximum  $\Delta I/I$   
219 occurred on  $S_2$  (flash 1,5,9 etc.) and minimum  $\Delta I/I$  on  $S_0$  (flash 3,7,11 etc.) (29). No differences could  
220 be observed in either the amplitude or the damping of the oscillations between the excitation  
221 wavelengths. When using sub-saturating flashes ( $\sim 83\%$  power), the damping of the oscillations was the  
222 same for all excitation wavelengths (Fig. 4B), verifying that the illumination with 100% laser power  
223 was saturating at all the wavelengths. The equal amplitude of the oscillations obtained at all excitation  
224 wavelengths also indicates that the FR *C. thermalis* sample used does not contain any detectable Chl-  
225 a-PSII contamination. No differences in the oscillation patterns measured in FR *C. thermalis* Chl-f-PSII  
226 cores and in *A. marina* membranes, flashed at either 680 or 725 nm, were observed (Fig. 4C). The PSII  
227 of *T. elongatus* showed a normal S-states progression when using 680 nm excitation, but no oscillation



228 pattern when far-red flashes were used (Fig. 4D). For all samples the calculated miss factor was ~10%  
229 (Fig. S4).

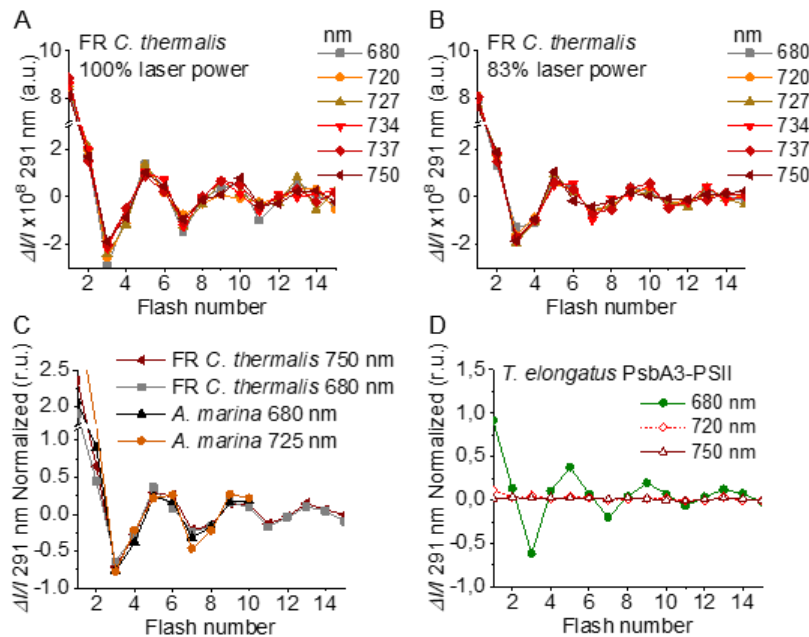

230

231 Fig. 4. Flash-induced S-state turnover in FR *C. thermalis* PSII cores, *A. marina* membranes, and *T. elongatus* PsbA3-  
232 PSII cores. Absorption changes were measured at 291 nm at 100 ms after each of a series of single-turnover  
233 saturating flashes fired with a 300 ms time interval. (A) and (B) Measurements in FR *C. thermalis* PSII cores using  
234 flashes at the indicated wavelengths with 100% and 83% laser power (the power of the laser at the different  
235 wavelengths is reported in the Supplementary Materials and Methods). (C) Comparison between the absorption  
236 changes obtained in FR *C. thermalis* PSII cores and *A. marina* membranes using flashes at the indicated  
237 wavelengths (100% laser power). The traces in (C) were normalized on the maximal oscillation amplitude (3<sup>rd</sup>  
238 minus 5<sup>th</sup> flash). The breaks in the vertical axes in panels (A-C) allow the oscillation pattern to be re-scaled for  
239 clarity, because the absorption change on the first flash contains a large non-oscillating component (29) that was  
240 not included in the fits. (D) Measurements in isolated *T. elongatus* PsbA3-PSII cores using flashes at the indicated  
241 wavelengths.

242 In conclusion, the data reported here show that the overall efficiency of electron transfer from water to  
243 the PQ pool is comparable in all three types of PSII (independently of the Chl-a-PSII control used), as  
244 shown by the near-identical flash patterns of thermoluminescence (Fig. S3) and O<sub>2</sub> release (Fig. 3), both  
245 measured without external electron acceptors. When the S-state turnover was measured by following  
246 the absorption of the Mn cluster in the UV (Fig. 4), the use of artificial electron acceptors and single-  
247 turnover saturating flashes allowed us to obtain better resolved flash patterns that were essentially  
248 indistinguishable in all three types of PSII and between excitation with visible or far-red light in the  
249 case of the Chl-d-PSII and Chl-f-PSII.

250

### 251 2.3 - Back-reactions measured by (thermo)luminescence

252 Charge recombination reactions were investigated by monitoring the thermoluminescence and  
253 luminescence emissions. The TL curves in Fig. 5A and B show that both Chl-f-PSII and Chl-d-PSII are  
254 more luminescent than Chl-a-PSII, with Chl-f-PSII being the most luminescent. These differences, that  
255 are much larger than the variability between biological replicates (Fig. S5 and Table S3), fit qualitatively  
256 with earlier reports (5, 31). The high luminescence indicates that in the Chl-d-PSII and Chl-f-PSII there  
257 is an increase in radiative recombination, although the causes of this increase are likely to be different  
258 between the two photosystems, as detailed in the Discussion.

259 Despite the large difference in TL intensity between the Chl-a-PSII and Chl-f-PSII, the peak  
260 temperatures corresponding to the  $S_2Q_B^-$  and  $S_2Q_A^-$  recombination were both similar in Chl-a-PSII and  
261 Chl-f-PSII. In Chl-d-PSII, the temperature of the  $S_2Q_B^-$  peak was only slightly lower, while the  $S_2Q_A^-$   
262 peak was  $\sim 15^\circ\text{C}$  lower (Fig. S5 and Table S3). Earlier TL reports comparing Chl-d-PSII in *A marina*  
263 cells with Chl-a-PSII in *Synechocystis* cells also showed that, while the peak position of  $S_2Q_B^-$   
264 recombination was similar in the two samples, the  $S_2Q_A^-$  peak position was lower in *A. marina* (31), in  
265 agreement with the present results in membranes. The peak temperatures measured in cells were lower  
266 than those reported here, which can be explained by i) the effect of the transmembrane electric field, as  
267 discussed for the fluorescence decay (section 2.1), and ii) by differences in the heating rates used ( $1^\circ\text{C}$   
268  $\text{s}^{-1}$  here,  $0.33^\circ\text{C s}^{-1}$  in (31)). When performing the same measurements in *Synechocystis* membranes  
269 (Fig. S6), the  $S_2Q_B^-$  and  $S_2Q_A^-$  peak positions were comparable to those obtained in the two *C. thermalis*  
270 samples, confirming that the lower  $S_2Q_A^-$  peak temperature is a specific feature of Chl-d-PSII.

271 The  $S_2Q_A^-$  recombination in the presence of DCMU was also measured by luminescence decay kinetics  
272 at 10, 20 and  $30^\circ\text{C}$ , a range of temperatures that covers those of the  $S_2Q_A^-$  TL peaks of the three samples.  
273 Luminescence decay kinetics were recorded from 570 ms for 300 seconds after the flash. In this time-  
274 range, the luminescence arises mainly from recombination *via* the back-reaction of  $S_2Q_A^-$  (32). The total  
275  $S_2Q_A^-$  luminescence emission (Fig. 5C) reflected the intensities of the TL peaks, as expected (33), with  
276 the order of intensity as follows: Chl-f-PSII > Chl-d-PSII > Chl-a-PSII (although the variability between  
277 replicates made the difference between Chl-a-PSII and Chl-d-PSII less significant than that measured  
278 by TL). The total emissions did not vary significantly between 10 and  $30^\circ\text{C}$ , although the decay kinetics  
279 were temperature-sensitive (Fig. S7). The decay components identified by fitting the curves and their  
280 significance are discussed further in the SI. The luminescence decay attributed to  $S_2Q_A^-$  recombination  
281 was bi-phasic (Table S4), with the kinetics of both phases being faster in Chl-d-PSII ( $\sim 3$  and  $\sim 11$  s)  
282 than in Chl-a-PSII ( $\sim 4$  and  $\sim 25$  s), but slower in Chl-f-PSII ( $\sim 9$  and  $\sim 39$  s). The average  $S_2Q_A^-$   
283 luminescence decay lifetimes accelerated with increasing temperature in Chl-a-PSII and Chl-f-PSII but  
284 were always the fastest in Chl-d-PSII and the slowest in Chl-f-PSII (Fig. 5D). The luminescence decay  
285 kinetics of the Chl-a-PSII in *Synechocystis* membranes were similar to those measured in WL *C.*

286 *thermalis* (Fig. S8), suggesting, as seen with the TL data, that the differences in kinetics observed in the  
 287 two types of far-red PSII are not due to differences between species.

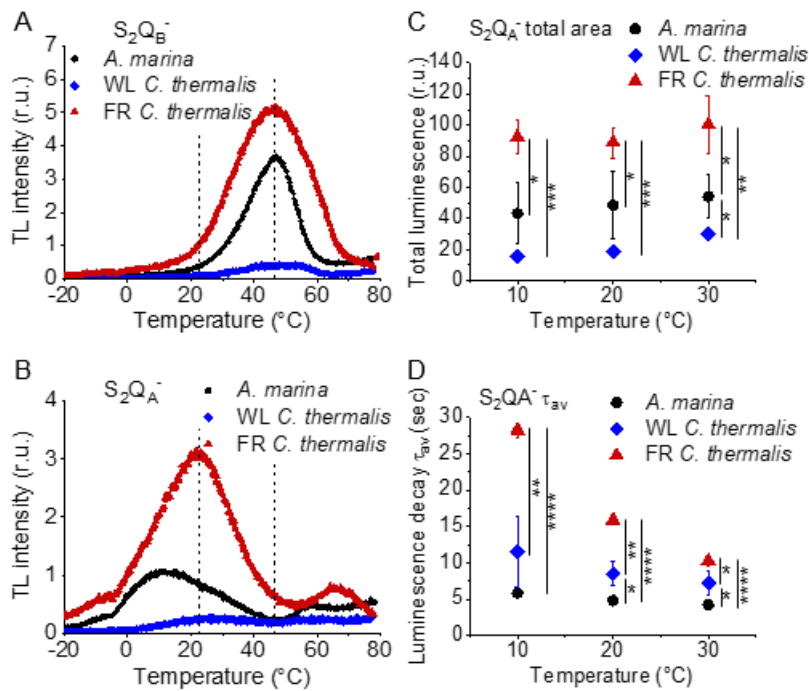

288

289 Fig. 5. Thermoluminescence and luminescence measured in *A. marina*, WL *C. thermalis* and FR *C. thermalis*  
 290 membranes. (A) and (B) TL measured in the absence of inhibitors ( $S_2Q_B^-$ ) or in the presence of DCMU ( $S_2Q_A^-$ ),  
 291 respectively. The signal intensities are normalized on the maximal oxygen evolution rates of each sample. The  
 292 dashed vertical lines indicate the two peak positions of the *C. thermalis* samples. (C) Plots of the total  $S_2Q_A^-$   
 293 luminescence emission (integrated area below the curves), normalized on the maximal oxygen evolution rate of  
 294 each sample, at 10, 20 and 30°C. (D) Plots of the average  $S_2Q_A^-$  luminescence decay lifetimes ( $\tau_{av}$ ), calculated from  
 295 the decay phases attributed to  $S_2Q_A^-$  recombination, as a function of temperature. In (C) and (D) each point  
 296 represents the average of 3 biological replicates  $\pm$ s.d. Statistically significant differences according to Student's t-  
 297 tests are indicated with asterisks (\* $p \leq 0.05$ , \*\* $p \leq 0.01$ , \*\*\* $p \leq 0.001$ , \*\*\*\* $p \leq 0.0001$ ).

298

299 In conclusion, both Chl-f-PSII and Chl-d-PSII show strongly enhanced luminescence, as previously  
 300 reported (5, 34). However, the Chl-d-PSII differs from the Chl-a-PSII and Chl-f-PSII by having a lower  
 301  $S_2Q_A^-$  TL peak temperature and a faster  $S_2Q_A^-$  luminescence decay. This indicates that Chl-d-PSII has  
 302 a smaller energy gap between  $Q_A^-$  and Phe compared to Chl-a-PSII and Chl-f-PSII. The lower TL  
 303 temperature and faster luminescence decay for  $S_2Q_A^-$  recombination in Chl-d-PSII, but without a  
 304 marked increase in its  $Q_A^-$  decay rate as monitored by fluorescence (Fig. 2), could reflect differences in  
 305 the competition between radiative and non-radiative recombination pathways in Chl-d-PSII compared  
 306 to those in Chl-a-PSII and Chl-f-PSII. In contrast, in Chl-f-PSII the energy gap between  $Q_A^-$  and Phe  
 307 does not appear to be greatly affected or could even be larger, as suggested by the slower  $S_2Q_A^-$

308 recombination measured by fluorescence (Fig. 2) and slower luminescence (Fig. 3) decay. The  $Q_B$   
309 potentials appear to be largely unchanged, as manifest by the similar  $S_2Q_B^-$  stability in all three types of  
310 PSII, with the slightly lower  $S_2Q_B^-$  TL peak temperature in *A. marina*, probably reflecting the decrease  
311 in the energy gap between  $Q_A^-$  and Phe.

312

#### 313 **2.4 - Singlet oxygen production and sensitivity to high light in the far-red PSII**

314 The smaller energy gap between  $Q_A^-$  and Phe reported here in *A marina* is expected to result in enhanced  
315 singlet  $O_2$  production and hence greater sensitivity to photodamage (5, 15, 35, 36). This was investigated  
316 by measuring the rates of  $^1O_2$  generation induced by saturating illumination in isolated membranes using  
317 histidine as a chemical trap (Fig. 6A, representative traces in Fig. S10A-C).  $^1O_2$  reacts with histidine to  
318 form the final oxygenated product, HisO<sub>2</sub>, resulting in the consumption of  $O_2$ , as measured using the  $O_2$   
319 electrode. Without the histidine trap, most  $^1O_2$  is thought to be quenched by carotenoids (37). When  
320 histidine was present in addition to DCMU, the Chl-d-PSII in *A. marina* membranes showed significant  
321 light-induced  $^1O_2$  formation. Under the same conditions, little  $^1O_2$  formation occurred in Chl-a-PSII or  
322 Chl-f-PSII in *C. thermalis* membranes. Similarly low levels of  $^1O_2$  were generated by Chl-a-PSII in  
323 *Synechocystis* membranes (Fig. S10D). Sodium azide, a  $^1O_2$  quencher, suppressed the His-dependent  
324 oxygen consumption measured in the presence of DCMU, confirming that it was due to the production  
325 of  $^1O_2$  (Fig. S10E).

326 The strikingly high amount of  $^1O_2$  generated by Chl-d-PSII prompted us to perform additional controls.  
327 i) To test if the high  $^1O_2$  production was related to the intactness of the PSII donor side, Mn was removed  
328 from *A. marina* membranes by Tris-washing. This had little effect on the  $^1O_2$  formation with respect to  
329 the Mn-containing membranes (Fig. S11), suggesting that the high  $^1O_2$  production in untreated *A.*  
330 *marina* membranes does not arise specifically from the fraction of centers lacking an intact Mn-cluster  
331 that are likely possibly responsible for the non-decaying fluorescence observed in Fig. 2B and S1. ii)  
332 The possibility that photosystem I (PSI) contributed to the light-induced  $O_2$  consumption by reducing  
333 oxygen to  $O_2^-$  in membranes was tested (Fig. S12). In the presence of DCMU, PSI-driven  $O_2$  reduction  
334 mediated by methyl viologen only took place when exogenous electron donors to PSI were provided.  
335 This indicates that there is no contribution from PSI-induced  $O_2$  reduction in Fig. 4A, where exogenous  
336 PSI donors are absent. iii) The higher  $^1O_2$  production is also seen in *A. marina* cells (Fig. S13A)  
337 compared to FR *C. thermalis* cells, and thus is not an artefact associated with the isolation of  
338 membranes. WL *C. thermalis* cells also showed low levels of  $^1O_2$  production, similar to those measured  
339 in membranes (Fig. S13B).

340

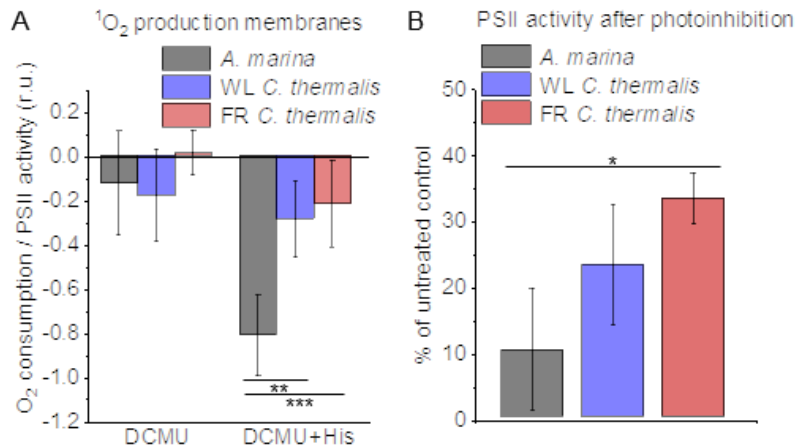

341

342 Fig. 6.  $^1\text{O}_2$  production and PSII sensitivity to high light in *A. marina*, WL *C. thermalis* and FR *C. thermalis* membranes.

343 All samples were used at a chlorophyll concentration of  $5 \mu\text{g ml}^{-1}$ . (A)  $^1\text{O}_2$  production in presence of DCMU

344 measured as the rate of histidine-dependent consumption of  $\text{O}_2$  induced by saturating illumination (xenon lamp,

345  $7100 \mu\text{mol photons m}^{-2} \text{s}^{-1}$ , saturation curves in Fig. S9B and C). The data are averages ( $\pm$ s.d.) of 6 biological

346 replicates for *A. marina* and FR *C. thermalis* and 3 replicates for WL *C. thermalis*. For each replicate, the rates of

347 oxygen consumption were normalized to the maximal oxygen evolution rates measured in presence of DCBQ and

348 ferricyanide. (B) Maximal PSII activities, measured as in (A), after 30 min illumination with saturating red light ( $660$

349 nm LED,  $2600 \mu\text{mol photons m}^{-2} \text{s}^{-1}$ ) relative to the maximal activities measured in control samples kept in

350 darkness. The light used for the 30 minutes treatment was as saturating as the xenon lamp used in (A) (Fig. S9D

351 and E). The data are averages of 3 biological replicates  $\pm$ s.d. Statistically significant differences according to

352 Student's t-tests are indicated with asterisks (\* $p \leq 0.05$ , \*\* $p \leq 0.01$ , \*\*\* $p \leq 0.001$ ).

353

354 Figure 4B shows the effect of 30 minutes of saturating illumination (red light) on the activity of the

355 Chl-d-PSII, Chl-a-PSII and Chl-f-PSII. The results show that Chl-d-PSII is significantly more

356 susceptible to light induced loss of activity compared to Chl-f-PSII, and to a lesser extent to Chl-a-PSII,

357 and this can be correlated to the higher levels of  $^1\text{O}_2$  production in Chl-d-PSII.

358

359

### 3 - Discussion

360 We investigated several functional properties of the two different types of far-red PSII, i) the

361 constitutive Chl-d-PSII of *A. marina*, and ii) the facultative Chl-f-PSII of *C. thermalis*. We compared

362 these properties with each other and with those of standard Chl-a-PSII, from either WL *C. thermalis*,

363 *Synechocystis* or *T. elongatus*, looking for differences potentially related to the diminished energy

364 available in the two long-wavelength PSII variants.

#### 365 3.1 – Forward electron transfer and enzymatic activity

366 The turnover of the water oxidation cycle is comparably efficient in all three types of PSII, as shown  
367 by their near-identical flash patterns in thermoluminescence (Fig. S3), O<sub>2</sub> release (Fig. 3), and UV  
368 spectroscopy (Fig. 4). In PSII, a photochemical “miss factor” can be calculated from the damping of  
369 the flash patterns of O<sub>2</sub> evolution. These misses, which are typically ~10% in Chl-a-PSII, are mainly  
370 ascribed to the μs to ms recombination of S<sub>2</sub>TyrZ•Q<sub>A</sub><sup>-</sup> and S<sub>3</sub>TyrZ•Q<sub>A</sub><sup>-</sup> states (38). Despite the  
371 diminished energy available, the miss factors in both types of far-red PSII were virtually unchanged  
372 compared to Chl-a-PSII, which also suggests that they have the same origin. If so, the energy gaps  
373 between TyrZ and P<sub>D1</sub>, and thus their redox potentials, would be essentially unchanged. These  
374 conclusions agree with those in earlier work on Chl-d-PSII (39) and on Chl-f-PSII (5).

375 The similar flash-patterns also indicate that, after the primary charge separation, the electron transfer  
376 steps leading to water oxidation must have very similar efficiencies in all three types of PSII, i.e. close  
377 to 90%, and that there are no major changes affecting the kinetics of forward electron transfer, as  
378 pointed out earlier based on less complete data (5). Indeed, electron transfer from Q<sub>A</sub><sup>-</sup> to Q<sub>B</sub>/Q<sub>B</sub><sup>-</sup>,  
379 monitored by fluorescence, showed no significant differences in kinetics in the three types of PSII (Fig.  
380 2A).

### 381 3.2 – Back reactions and singlet oxygen production

382 The most striking difference between the three types of PSII is that the Chl-d-PSII of *A. marina* shows  
383 a decreased stability of S<sub>2</sub>Q<sub>A</sub><sup>-</sup>, indicated by the lower temperature of its TL peak and the correspondingly  
384 faster luminescent decay kinetics (Fig. 5), and consequently a significant increase in <sup>1</sup>O<sub>2</sub> generation  
385 under high light (Fig. 6A). This likely corresponds to the decrease in the energy gap between Phe and  
386 Q<sub>A</sub> predicted to result from the ~100 meV lower energy available when using light at ~720 nm to do  
387 photochemistry (5, 15). This is also supported by the estimates in the literature of the redox potential  
388 (E<sub>m</sub>) values of Phe/Phe<sup>-</sup> and Q<sub>A</sub>/Q<sub>A</sub><sup>-</sup> in Mn-containing Chl-d-PSII: compared to Chl-a-PSII, the  
389 estimated increase of ~125 mV in the E<sub>m</sub> of Phe/Phe<sup>-</sup> is accompanied by an estimated increase of only  
390 ~60 mV in the E<sub>m</sub> of Q<sub>A</sub>/Q<sub>A</sub><sup>-</sup>, which implies that a normal energy gap between the excited state of the  
391 primary donor (Chl<sub>D1</sub><sup>\*</sup>) and the first and second radical pairs (Chl<sub>D1</sub><sup>+</sup>Phe<sup>-</sup> and P<sub>D1</sub><sup>+</sup>Phe<sup>-</sup>) is maintained,  
392 but the energy gap between P<sub>D1</sub><sup>+</sup>Phe<sup>-</sup> and P<sub>D1</sub><sup>+</sup>Q<sub>A</sub><sup>-</sup> is significantly decreased (~325 meV vs ~385 meV)  
393 (40). The changes in the D1 and D2 proteins of *A. marina* responsible for the changes in the E<sub>m</sub> of  
394 Phe/Phe<sup>-</sup> and Q<sub>A</sub>/Q<sub>A</sub><sup>-</sup> are currently unknown. Our results indicate that in Chl-d-PSII, the decrease in the  
395 energy gap between Phe and Q<sub>A</sub> favors charge recombination by the back-reaction route (via P<sub>D1</sub><sup>+</sup>Phe<sup>-</sup>  
396 ), forming the reaction center chlorophyll triplet state (41), which acts as an efficient sensitizer for <sup>1</sup>O<sub>2</sub>  
397 formation (35, 36, 42, 43). Consequently, the Chl-d-PSII is more sensitive to high light (Fig. 6B). The  
398 increase in the proportion of recombination going via P<sub>D1</sub><sup>+</sup>Phe<sup>-</sup> can also result in a higher repopulation  
399 of the excited state of the primary donor (Chl<sub>D1</sub><sup>\*</sup>), with a consequent increase in radiative decay (high  
400 luminescence).

401 In contrast to the Chl-d-PSII, the Chl-f-PSII shows no increased production of  $^1\text{O}_2$  and no increased  
402 sensitivity to high light compared to Chl-a-PSII, in the conditions tested here (Fig. 6). The back-  
403 reactions appear to be little different from the Chl-a-PSII except for the more stable (more slowly  
404 recombining)  $\text{S}_2\text{Q}_\text{A}^-$ , as seen by fluorescence (Fig. 2) and luminescence (Fig. 5) decay. These properties  
405 may seem unexpected because this type of PSII has the same energy available for photochemistry as  
406 the Chl-d-PSII. In the Chl-d-PSII the lower energy of  $\text{Chl}_{\text{D1}}^*$  is matched by an increase in the  $E_\text{m}$  of  
407 Phe/Phe $^-$ . In the Chl-f-PSII of *C. thermalis* and of the other Chl-f containing species, the  $E_\text{m}$  of Phe/Phe $^-$   
408 is also expected to be increased by the presence, in the far-red D1 isoform, of the strong H-bond from  
409 Glu130 (Fig. S14), which is characteristic of high-light D1 variants in cyanobacteria (44). In Chl-a-PSII  
410 this change has been reported to induce an increase in the  $E_\text{m}$  of Phe/Phe $^-$  between  $\sim 15$  and  $\sim 30$  mV (44,  
411 45): an increase of this size would only partially compensate for the  $\sim 100$  meV decrease in the energy  
412 of  $\text{Chl}_{\text{D1}}^*$  in Chl-f-PSII, and this would result in a smaller energy gap between  $\text{Chl}_{\text{D1}}^*$  and the first and  
413 second radical pairs  $\text{Chl}_{\text{D1}}^+\text{Phe}^-$  and  $\text{P}_{\text{D1}}^+\text{Phe}^-$ . This would favor the repopulation of  $\text{Chl}_{\text{D1}}^*$  by back-  
414 reaction from  $\text{P}_{\text{D1}}^+\text{Phe}^-$  (even if the repopulation of  $\text{P}_{\text{D1}}^+\text{Phe}^-$  from the  $\text{P}_{\text{D1}}^+\text{Q}_\text{A}^-$  state did not increase),  
415 resulting in the higher luminescence of Chl-f-PSII, as proposed earlier (5).

416 The longer lifetime of  $\text{S}_2\text{Q}_\text{A}^-$  recombination in Chl-f-PSII indicates that the  $E_\text{m}$  of  $\text{Q}_\text{A}/\text{Q}_\text{A}^-$  has increased  
417 to compensate the up-shift in the  $E_\text{m}$  of Phe/Phe $^-$  and to maintain an energy gap between Phe and  $\text{Q}_\text{A}$   
418 large enough to prevent an increase in reaction center chlorophyll triplet formation. This situation  
419 occurs in the PsbA3-D1 high light variant of *T. elongatus*, although the protein changes responsible for  
420 the increase in the  $E_\text{m}$  of  $\text{Q}_\text{A}/\text{Q}_\text{A}^-$  are not known (44). A slower  $\text{S}_2\text{Q}_\text{A}^-$  recombination could also arise  
421 from an increase in the redox potential of  $\text{P}_{\text{D1}}/\text{P}_{\text{D1}}^+$  (46, 47), but this would likely compromise forward  
422 electron transfer in Chl-f-PSII by decreasing the driving force for stabilization of  $\text{Chl}_{\text{D1}}^+\text{Phe}^-$  into  
423  $\text{P}_{\text{D1}}^+\text{Phe}^-$ , if the redox potential of  $\text{Chl}_{\text{D1}}/\text{Chl}_{\text{D1}}^+$  was not increased accordingly, or by decreasing the  
424 already diminished reducing power of  $\text{Chl}_{\text{D1}}^*$ , if the redox potential of  $\text{Chl}_{\text{D1}}/\text{Chl}_{\text{D1}}^+$  was increased  
425 accordingly, which is not what we observe (Fig. 2A).

### 426 3.5 – Effects of the pigment composition on the energetics of the far-red PSII

427 In addition to changes in the redox potentials of Phe and  $\text{Q}_\text{A}$ , the size and pigment composition of the  
428 antennas of Chl-d-PSII and Chl-f-PSII could also contribute to the functional differences reported in  
429 the present work. These differences are summarized in Fig. 7.

430 In PSII, two factors will determine the yield of charge separation: i) the relative population of the excited  
431 state of the primary donor,  $\text{Chl}_{\text{D1}}^*$ , which depends on the dynamics of excitation energy transfer between  
432 pigments, and ii) the rate of population of the second radical pair,  $\text{P}_{\text{D1}}^+\text{Phe}^-$ , that is more stable (less  
433 reversible) than the first radical pair,  $\text{Chl}_{\text{D1}}^+\text{Phe}^-$ . This rate is determined by the rates of the primary  
434 charge separation (forming  $\text{Chl}_{\text{D1}}^+\text{Phe}^-$ ) and of its stabilization by secondary electron transfer (forming  
435  $\text{P}_{\text{D1}}^+\text{Phe}^-$ ), and hence by the energetic of these electron transfer steps.

436 In the Chl-a-PSII core, the 37 chlorins absorb light between ~660 and ~690 nm and are therefore almost  
437 isoenergetic to the Chl<sub>D1</sub> primary donor absorbing at 680 nm. Given the small energy differences, there  
438 is little driving force for downhill “funneling” of excitation energy to Chl<sub>D1</sub>, making it a “shallow trap”.  
439 Different models have been proposed to explain the shallowness of the photochemical trap in Chl-a-  
440 PSII.

441 In the trap-limited model, the transfer of excitation between pigments is significantly faster than the  
442 electron transfer reactions leading to P<sub>D1</sub><sup>+</sup>Phe<sup>-</sup> formation, and a near-complete equilibration of the  
443 excitation energy is established over all pigments, including Chl<sub>D1</sub>, with a distribution that is determined  
444 by their individual site energies (48–50). This leads to a low population of Chl<sub>D1</sub><sup>\*</sup> (see Table S5), that  
445 is diminished as a function of the number of quasi-isoenergetic pigments with which it shares the  
446 excitation energy.

447 In the transfer-to-trap limited model, the small driving force for downhill “funneling” of excitation  
448 energy to Chl<sub>D1</sub> causes kinetic bottlenecks for excitation energy equilibration between the core antenna  
449 complexes CP43 and CP47 and for excitation energy transfer from these antennas to the reaction center  
450 (51–54). In this scenario, there is not a full equilibration of the excitation energy over all pigments, but  
451 the relatively slow and reversible energy transfer from the core antennas to the reaction center still leads  
452 to a relatively low population of Chl<sub>D1</sub><sup>\*</sup>.

453 Irrespectively of the differences in the details of the kinetic limitation to photochemical trapping  
454 between the two models, the common requirement for establishing a high quantum yield of charge  
455 separation is a sufficiently large overall energy gap (~160 meV, (47)) between Chl<sub>D1</sub><sup>\*</sup> and P<sub>D1</sub><sup>+</sup>Phe<sup>-</sup>, i.e.  
456 comprising the primary charge separation (Chl<sub>D1</sub><sup>\*</sup> ↔ Chl<sub>D1</sub><sup>+</sup>Phe<sup>-</sup>) and secondary electron transfer  
457 (Chl<sub>D1</sub><sup>+</sup>Phe<sup>-</sup> ↔ P<sub>D1</sub><sup>+</sup>Phe<sup>-</sup>), as shown in Fig. 7. An energy gap of this magnitude is required to avoid rapid  
458 recombination to the excited state Chl<sub>D1</sub><sup>\*</sup>, thereby limiting the probability of its dissipation via non-  
459 photochemical relaxation to the ground state in the antenna (53, 55).

460 For Chl-d-PSII the antenna system is comparable to that in Chl-a-PSII: all 34 Chl-d molecules,  
461 including the primary donor Chl<sub>D1</sub> at ~720 nm, are close in wavelength and thus both systems are  
462 expected to have comparable Chl<sub>D1</sub><sup>\*</sup> population (Table S5), irrespective of the rate-limitation model  
463 assumed. Chl-a-PSII and Chl-d-PSII should therefore have the same energetic requirements to ensure a  
464 sufficiently high yield of charge separation. Given that the energy of Chl<sub>D1</sub><sup>\*</sup> is ~100 meV lower in Chl-  
465 d-PSII than in Chl-a-PSII, the energy level of the second and more stable radical pair, P<sub>D1</sub><sup>+</sup>Phe<sup>-</sup>, needs  
466 to be decreased by ~100 meV in Chl-d-PSII relative to Chl-a-PSII. This corresponds to the published  
467 E<sub>m</sub> of Phe/Phe<sup>-</sup> (40) and to the kinetic data (Fig. 5 and 6), as detailed in the previous section.

468 In *A. marina* membranes, additional Chl-d containing antenna proteins, which form supercomplexes  
469 with PSII cores, have been reported to increase the Chl-d-PSII antenna size by almost 200% (56). This  
470 will likely result in an increased sharing of the excited state, leading to a diminished population of



471  $\text{Chl}_{\text{D1}}^*$ , and thus a bigger requirement for an energy drop between  $\text{Chl}_{\text{D1}}^*$  and  $\text{P}_{\text{D1}}^+\text{Phe}^-$  to ensure  
472 efficient charge separation. At the same time, the larger near-isoenergetic antenna could also contribute  
473 to its higher luminescence, by increasing the probability of  $\text{Chl}_{\text{D1}}^*$  decay via radiative emission with  
474 respect to photochemical re-trapping (57). This is similar to what happens in plant PSII, where the yield  
475 of photochemical trapping of excitation energy is decreased by 10-15% by the association of the Light  
476 Harvesting Complex antennas (58).

477 The pigment layout of Chl-f-PSII is very different from that of Chl-a-PSII and Chl-d-PSII. The 30 Chl-  
478 a molecules are energetically separated from  $\text{Chl}_{\text{D1}}$ , absorbing at 720 nm, by  $>30$  nm ( $>3k_B T$ ). This  
479 means excitation energy resides predominantly on  $\text{Chl}_{\text{D1}}^*$  and on the other 4 far-red pigments. If the  
480 equilibration of the excitation energy between the 5 far-red pigments were significantly faster than  
481 charge separation, this pigment arrangement would result in a higher probability of populating  $\text{Chl}_{\text{D1}}^*$   
482 in Chl-f-PSII than in Chl-a-PSII and Chl-d-PSII (table S5). The higher  $\text{Chl}_{\text{D1}}^*$  population in Chl-f-PSII  
483 could ensure that sufficient yield of charge separation is achieved even when the  $E_m$  of Phe/Phe<sup>-</sup> is  
484 increased by much less than the 100 meV needed to compensate for the nominally lower energy in  
485  $\text{Chl}_{\text{D1}}^*$ .

486 However, thermal equilibration of the excitation energy over the entire antenna in Chl-f-PSII might not  
487 occur due to 3 of the 4 long-wavelength antenna chlorophylls absorbing at longer wavelength than  
488  $\text{Chl}_{\text{D1}}$ . This type of antenna energetics could result in rapid excited state equilibration in each of the  
489 three main pigment-protein complexes (CP43, CP47 and reaction center), due to rapid energy transfer  
490 from Chl-a to Chl-f/d (with visible light excitation) followed by slower transfer from the two postulated  
491 far-red antenna pools to  $\text{Chl}_{\text{D1}}$ , leading to a transfer-to-trap limited bottleneck. As a result, the kinetics  
492 of excitation energy transfer from the red and far-red antenna to the reaction center could be more  
493 complex than in Chl-a-PSII and Chl-d-PSII, explaining the spread in charge separation kinetics that has  
494 been suggested based on ultrafast absorption data (59) and the slower excitation energy trapping kinetics  
495 measured by time-resolved fluorescence (60).

496 The driving force for charge separation is decreased in Chl-f-PSII also by the smaller energy gap  
497 between  $\text{Chl}_{\text{D1}}^*$  and  $\text{P}_{\text{D1}}^+\text{Phe}^-$ , estimated to be  $\sim 80$  meV in Chl-f-PSII compared to  $\sim 160$  meV in Chl-  
498 a-PSII and Chl-f-PSII (Fig. 7). This decrease in the energy gap between  $\text{Chl}_{\text{D1}}^*$  and  $\text{P}_{\text{D1}}^+\text{Phe}^-$  is  
499 necessary in Chl-f-PSII to avoid the increased photosensitivity seen in Chl-d-PSII by maintaining a  
500 large energy gap between  $\text{P}_{\text{D1}}^+\text{Phe}^-$  and  $\text{P}_{\text{D1}}^+\text{Q}_A^-$  ( $\sim 385$  meV) (Fig. 7). Nonetheless, the slower excitation  
501 energy transfer and the smaller energy gap between  $\text{Chl}_{\text{D1}}^*$  and  $\text{P}_{\text{D1}}^+\text{Phe}^-$  could be partially  
502 compensated by the decreased dilution of the excitation energy on  $\text{Chl}_{\text{D1}}^*$  arising from the small number  
503 of long-wavelength antenna pigments, resulting in only a small loss of trapping efficiency (60) and a  
504 near-negligible effect on enzyme turnover efficiency (Figures 2-4 and (5)).

505 This energetic balancing trick in Chl-f-PSII, which allows both reasonably high enzyme efficiency and  
506 high resilience to photodamage (by limiting recombination via the repopulation of  $P_{D1}^+Phe^-$ ) despite  
507 working with 100 meV less energy, comes with a very significant disadvantage: its absorption cross-  
508 section at long wavelength is  $\sim 7$  times smaller than that of the standard core Chl-a-antenna in visible  
509 light. In the case of Chl-f-PSII, evolution therefore seems to have prioritized the minimization of  
510 harmful charge recombination, by maintaining a big energy gap between Phe and  $Q_A$ , over light  
511 collection and photochemical quantum efficiency. This makes sense as this system has evolved as a  
512 facultative survival mechanism, that is not advantageous when visible light is available.

513 In contrast, Chl-d-PSII seems to have maximized light collection at long wavelengths (with its full-size  
514 far-red antenna) and maximized the yield of charge separation (by maintaining the full  $Chl_{D1}^*$  to  
515  $P_{D1}^+Phe^-$  driving force). However, the energy shortfall at long wavelength is lost from the “energy  
516 headroom” (mainly from the transmembrane energy gap between Phe and  $Q_A$ ) that is proposed to  
517 minimize harmful charge recombination by buffering the effects of pulses of the trans-membrane  
518 electric field associated with fluctuations in light intensity (16, 61). This seems to correspond well to  
519 the shaded and stable epiphytic niche that *A. marina* occupies (7, 62–65).

520 Chl-d-PSII and Chl-f-PSII have evolved different strategies to do oxygenic photosynthesis in far-red  
521 light and have been impacted differently by the decrease in energy available. Understanding how the  
522 redox tuning of the electron transfer cofactors and the layout of the far-red pigments determine the  
523 trade-off between efficiency and resilience in PSII is a necessary step to inform strategies aimed at  
524 using far-red photosynthesis for agricultural and biotechnological applications.

525 The present findings suggest the exchange of the full Chl-a manifold to long-wavelength chlorophylls,  
526 as seen in Chl-d-PSII (*A. marina*), should allow efficient oxygenic photosynthesis, but only under  
527 constant shading and low fluctuating (stable) light conditions: e.g., for cultivation under LED light  
528 (vertical farming, etc). The more robust, facultative Chl-f PSII, would provide only a small increase in  
529 light usage efficiency due to the intrinsically low absorption cross-section in the far red, however this  
530 extension might be beneficial in a shaded canopy.

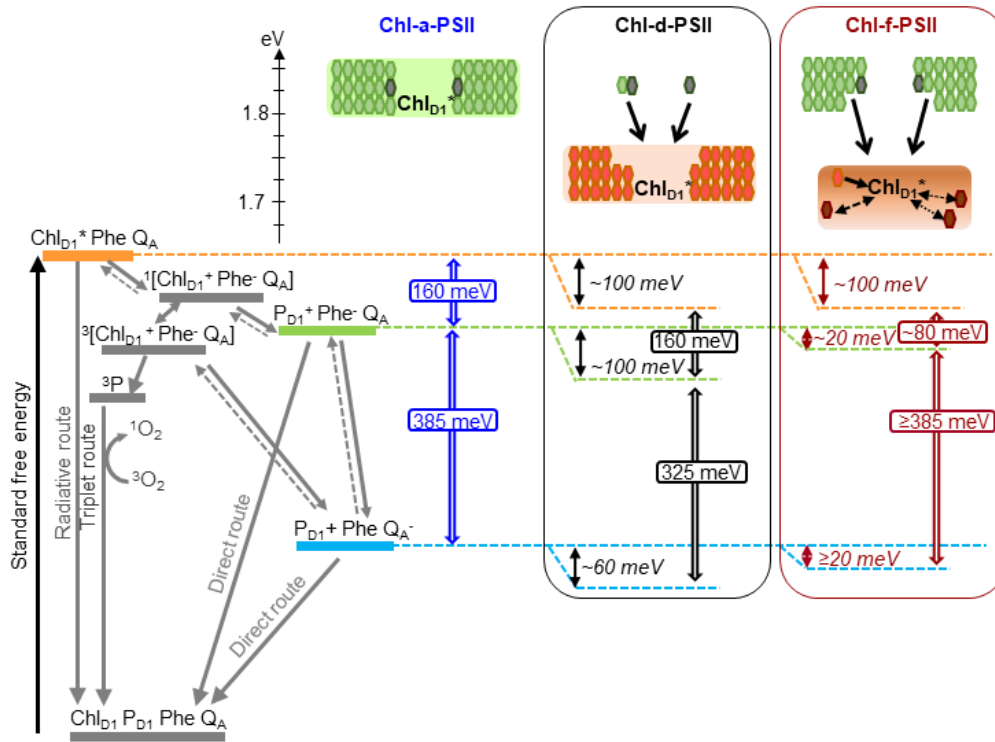

531

532

533 Fig. 7. Model of the energy differences in Chl-a-PSII, Chl-d-PSII and Chl-f-PSII. The top part of the figure represents  
 534 the localization of the excitation energy over the antenna pigments and Chl<sub>D1</sub>\* (energies in eV, scale on the left  
 535 side). The localization of the excitation energy is indicated by the colored boxes (green for Chl-a, orange for Chl-  
 536 d and brown for Chl-f), without necessarily assuming a full equilibration (see main text). In Chl-a-PSII, the  
 537 excitation is distributed over Chl<sub>D1</sub>, 34 antenna Chl-a (light green) and 2 Phe-a (dark grey); in Chl-d-PSII, the  
 538 excitation is distributed over Chl<sub>D1</sub> and 31 antenna Chl-d (orange) but not over the 1 Chl-a and 2 Phe-a, that  
 539 transfer excitation downhill to the Chl-d pigments (black arrows); in Chl-f-PSII, the excitation is distributed only  
 540 over Chl<sub>D1</sub>, one Chl-d and 3 Chl-f (brown), while the remaining 29 Chl-a and 2 Phe-a transfer excitation energy  
 541 downhill to the far-red pigments. In Chl-f-PSII, 3 of the far-red antenna pigments are at longer wavelength than  
 542 Chl<sub>D1</sub>, so transfer of excitation energy from them to Chl<sub>D1</sub> is less efficient (dashed and dotted black arrows). The  
 543 grading of the colored box for Chl-f represents uncertainty in the degree of excited state sharing between the  
 544 longest wavelength chlorophylls and Chl<sub>D1</sub>. The bottom part of the figure represents, on the left, the energetics  
 545 of the radical pairs and the recombination routes in PSII. The horizontal dashed lines represent the standard free  
 546 energies of Chl<sub>D1</sub>\* (orange), P<sub>D1</sub><sup>+</sup>Phe<sup>-</sup> (light green) and P<sub>D1</sub><sup>+</sup>Q<sub>A</sub><sup>-</sup> (light blue). The free energy gaps between Chl<sub>D1</sub>\*  
 547 and P<sub>D1</sub><sup>+</sup>Phe<sup>-</sup> and between P<sub>D1</sub><sup>+</sup>Phe<sup>-</sup> and P<sub>D1</sub><sup>+</sup>Q<sub>A</sub><sup>-</sup> in Chl-a-PSII (blue) and our current estimates for Chl-d-PSII (black)  
 548 and Chl-f-PSII (dark red) are represented on the right.

549

550

551

## 552 4 – Materials and Methods

### 553 4.1 – Cyanobacterial growth

554 *Acaryochloris marina* was grown in a modified liquid K-ESM medium containing 14  $\mu\text{M}$  iron (66), at  
555 30°C under constant illumination with far-red light (750 nm, Epitex; L750-01AU) at  $\sim 30$   $\mu\text{mol photons m}^{-2} \text{ s}^{-1}$ .  
556 *Chroococidiopsis thermalis* PCC7203 was grown in liquid BG11 medium (67) at 30°C, under  
557 two illumination conditions: white light at  $\sim 30$   $\mu\text{mol photons m}^{-2} \text{ s}^{-1}$  (for WL *C. thermalis* samples) and  
558 far-red light (750 nm, Epitex; L750-01AU) at  $\sim 30$   $\mu\text{mol photons m}^{-2} \text{ s}^{-1}$  (for FR *C. thermalis* samples).  
559 *Synechocystis sp.* PCC 6803 was grown in liquid BG11 medium at 30°C under constant illumination  
560 with white light at  $\sim 30$   $\mu\text{mol photons m}^{-2} \text{ s}^{-1}$ . The *Thermosynechococcus elongatus*  $\Delta\text{psbA1}$ ,  $\Delta\text{psbA2}$   
561 deletion mutant (30) was grown in liquid DNT medium at 45°C.

### 562 4.2 – Isolation of membranes and PSII cores

563 Membranes were prepared as described in the Supplementary Materials and Methods, frozen in liquid  
564 nitrogen and stored at -80°C until use. Partially purified *C. thermalis* PSII cores retaining oxygen  
565 evolution activity were isolated by anion exchange chromatography using a 40 ml DEAE column. The  
566 column was equilibrated with 20 mM MES-NaOH pH 6.5, 5 mM  $\text{CaCl}_2$ , 5 mM  $\text{MgCl}_2$  and 0.03% (w/v)  
567  $\beta$ -DM (n-Dodecyl- $\beta$ -D-maltoside) and elution was done using a linear gradient of  $\text{MgSO}_4$  from 0 to 200  
568 mM in 100 min (in the same buffer conditions as those used to equilibrate the column), with a flow rate  
569 of 4 ml  $\text{min}^{-1}$ . Fractions enriched in PSII were pooled, frozen in liquid nitrogen and stored at -80°C.  
570 PSII-PsbA3 cores from *T. elongatus* WT\*3 were purified as previously described (47).

### 571 4.3 – Fluorescence

572 Flash-induced chlorophyll fluorescence and its subsequent decay were measured with a fast double  
573 modulation fluorimeter (FL 3000, PSI, Czech Republic). Excitation was provided by a saturating 70  $\mu\text{s}$   
574 flash at 630 nm and the decay in  $Q_A^-$  concentration was probed in the 100  $\mu\text{s}$  to 100 s time region using  
575 non-actinic measuring pulses following a logarithmic profile as described in (21). The first measuring  
576 point was discarded during the data analysis because it contains a light artefact arising from the tail of  
577 the saturating flash used for excitation. Details on the analysis of the fluorescence curves are provided  
578 in the Supplementary Materials and Methods. Membrane samples were adjusted to a total chlorophyll  
579 concentration of 5  $\mu\text{g Chl ml}^{-1}$  in resuspension buffer, pre-illuminated with room light for 10 seconds  
580 and then kept in the dark on ice until used for measurements. Measurements were performed at 20°C.  
581 Where indicated, 20  $\mu\text{M}$  DCMU (3-(3,4-dichlorophenyl)-1,1-dimethylurea) was used.

### 582 4.4 – Thermoluminescence and luminescence

583 Thermoluminescence curves and luminescence decay kinetics were measured with a laboratory-built  
584 apparatus, described in (68). Membrane samples were diluted in resuspension buffer to a final

585 concentration of 5  $\mu\text{g Chl ml}^{-1}$  in the case of *A. marina* and FR *C. thermalis* and of 10  $\mu\text{g ml}^{-1}$  in the  
586 case of WL *C. thermalis* and *Synechocystis*. The samples were pre-illuminated with room light for 10  
587 seconds and then kept in the dark on ice for at least one hour before the measurements. When used, 20  
588  $\mu\text{M DCMU}$  was added to the samples before the pre-illumination step. Excitation was provided by  
589 single turnover saturating laser flashes (Continuum Minilite II, frequency doubled to 532 nm, 5 ns  
590 FWHM). Details on the measurement conditions and on the analysis of the luminescence decay kinetics  
591 are provided in the Supplementary Materials and Methods.

#### 592 4.5 – Oxygen evolution and consumption rates

593 Oxygen evolution and consumption rates were measured with a Clark-type electrode (Oxygraph,  
594 Hansatech) at 25°C. Membrane samples were adjusted to a total chlorophyll concentration of 5  $\mu\text{g Chl}$   
595  $\text{ml}^{-1}$ . Illumination was provided by a white xenon lamp filtered with a heat filter plus red filter, emitting  
596 600-700 nm light at 7100  $\mu\text{mol photons m}^{-2} \text{s}^{-1}$  (Quantitherm light meter, Hansatech). When required,  
597 the light intensity was reduced by using neutral density filters (Thorlabs). For PSII maximal oxygen  
598 evolution rates, 1 mM DCBQ (2,5-Dichloro-1,4-benzoquinone) and 2 mM potassium ferricyanide were  
599 used as an electron acceptor system. Photoinhibitory illumination was performed at room temperature  
600 for 30 min with a laboratory-built red LED (660 nm, 2600  $\mu\text{mol photons m}^{-2} \text{s}^{-1}$ ). For histidine-mediated  
601 chemical trapping of singlet oxygen, 20  $\mu\text{M DCMU}$ , 5 mM L-Histidine and, where specified, 10 mM  
602 sodium azide ( $\text{NaN}_3$ ) were used. PSI activity was measured as the rate of oxygen consumption in  
603 presence of 20  $\mu\text{M DCMU}$  and 100  $\mu\text{M methyl viologen}$  using 5 mM sodium ascorbate and 50  $\mu\text{M}$   
604 TMPD (N,N,N',N'-tetramethyl-p-phenylenediamine) as electron donors.

#### 605 4.6 – Flash-dependent oxygen evolution with Joliot electrode

606 Time-resolved oxygen polarography was performed using a custom-made centrifugable static ring-disk  
607 electrode assembly of a bare platinum working electrode and silver-ring counter electrode, as previously  
608 described (69). For each measurement, membranes equivalent to 10  $\mu\text{g}$  of total chlorophyll were used.  
609 Three different light sources were used to induce the S-state transitions: a red LED (613 nm), a far-red  
610 LED (730 nm) and a Xenon flashlamp. Details on the experimental setup and on the lights used are  
611 provided in the Supplementary Materials and Methods. Measurements were performed at 20°C. For  
612 each measurement, a train of 40 flashes fired at 900 ms time interval was given and the flash-induced  
613 oxygen-evolution patterns were taken from the maximal  $\text{O}_2$  signal of each flash and fitted with an  
614 extended Kok model as described in (28).

#### 615 4.7 – UV transient absorption

616 UV pump-probe absorption measurements were performed using a lab-built Optical Parametric  
617 Oscillator (OPO)-based spectrophotometer (70) with a time resolution of 10 ns and a spectral resolution  
618 of 2 nm (see Supplementary Materials and Methods for details on the setup). Samples were diluted in

619 resuspension buffer to a final concentration of 25  $\mu\text{g Chl ml}^{-1}$  for isolated *C. thermalis* and *T. elongatus*  
620 PSII cores and 40  $\mu\text{g Chl ml}^{-1}$  for *A. marina* membranes. Samples were pre-illuminated with room light  
621 for 10 seconds and then kept in the dark on ice for at least one hour before the measurements. 100  $\mu\text{M}$   
622 PPBQ (Phenyl-p-benzoquinone) was added just before the measurements. The sample was refreshed  
623 between each train of flashes. For each measurement, a train of 20 flashes (6 ns FWHM) fired at 300  
624 ms time interval was given, and absorption changes measured at 100 ms after each flash.

625

## 626 Acknowledgements

627 This work was supported by BBSRC grants BB/R001383/1, BB/V002015/1 and BB/R00921X. Julien  
628 Sellés acknowledges funding from the Labex Dynamo (ANR-11-LABX-0011-01). AB was in part  
629 supported by the French Infrastructure for Integrated Structural Biology (FRISBI) ANR-10-INBS-05.  
630 SS acknowledges support from Fondazione Cariplo, project “Cyanobacterial Platform Optimised for  
631 Bioproductions” (ref. 2016-0667).

632

633 Competing interests: The authors declare no competing interests. Data and materials availability: All  
634 data are available in the manuscript or the supplementary material.

635

## 636 Authors contributions

637 A.W.R., S.V. and A.F. conceived the study; S.V. performed the fluorescence, (thermo)luminescence,  
638 luminescence and oxygen evolution measurements and analyzed the data together with A.F. and  
639 A.W.R.; W.R. performed the photoinhibition measurements and analyzed the data; D.N. and R.A.  
640 performed the polarography measurements and analyzed the data with the help of H.D.; J.S., A.B. and  
641 S.V. performed the UV transient absorption measurements and analyzed the data; S.S. contributed to  
642 data analysis and interpretation; S.V. and A.W.R. wrote the manuscript, with contributions from A.B.,  
643 R.A., S.S., H.D. and A.F.. All authors approved the manuscript.

644

## 645 References

- 646 1. B. A. Diner, F. Rappaport, Structure, dynamics, and energetics of the primary photochemistry  
647 of Photosystem II of oxygenic photosynthesis. *Annu. Rev. Plant Biol.* **53**, 551–580 (2002)  
648 doi:10.1146/annurev.arplant.53.100301.135238.
- 649 2. A. R. Holzwarth, *et al.*, Kinetics and mechanism of electron transfer in intact photosystem II  
650 and in the isolated reaction center: Pheophytin is the primary electron acceptor. *Proc. Natl.*  
651 *Acad. Sci. U. S. A.* **103**, 6895–6900 (2006) doi:10.1073/pnas.0505371103.
- 652 3. E. Romero, I. H. M. Van Stokkum, V. I. Novoderezhkin, J. P. Dekker, R. Van Grondelle, Two

- 653 different charge separation pathways in photosystem II. *Biochemistry* **49**, 4300–4307 (2010)  
654 doi:10.1021/bi1003926.
- 655 4. T. Cardona, A. Sedoud, N. Cox, A. W. Rutherford, Charge separation in Photosystem II: A  
656 comparative and evolutionary overview. *Biochim. Biophys. Acta - Bioenerg.* **1817**, 26–43  
657 (2012) doi:10.1016/j.bbabi.2011.07.012.
- 658 5. D. J. Nürnberg, *et al.*, Photochemistry beyond the red limit in chlorophyll f-containing  
659 photosystems. *Science (80-. )*. **360**, 1210–1213 (2018) doi:10.1126/science.aar8313.
- 660 6. A. W. Rutherford, A. Osyczka, F. Rappaport, Back-reactions, short-circuits, leaks and other  
661 energy wasteful reactions in biological electron transfer: Redox tuning to survive life in O<sub>2</sub>.  
662 *FEBS Lett.* **586**, 603–616 (2012) doi:10.1016/j.febslet.2011.12.039.
- 663 7. H. Miyashita, *et al.*, Chlorophyll d as a major pigment. *Nature* **383**, 402 (1996)  
664 doi:10.1038/383402a0.
- 665 8. T. Renger, E. Schlöder, The primary electron donor of photosystem II of the cyanobacterium  
666 *Acaryochloris marina* is a chlorophyll d and the water oxidation is driven by a chlorophyll  
667 a/chlorophyll d heterodimer. *J. Phys. Chem. B* **112**, 7351–7354 (2008) doi:10.1021/jp801900e.
- 668 9. E. Schlöder, *et al.*, Both chlorophylls a and d are essential for the photochemistry in  
669 photosystem II of the cyanobacteria, *Acaryochloris marina*. *Biochim. Biophys. Acta -*  
670 *Bioenerg.* **1767**, 589–595 (2007) doi:10.1016/j.bbabi.2007.02.018.
- 671 10. M. Chen, *et al.*, A Red-Shifted Chlorophyll. *Science (80-. )*. **329**, 1318–1319 (2010)  
672 doi:10.1126/science.1191127.
- 673 11. F. Gan, *et al.*, Extensive remodeling of a cyanobacterial photosynthetic apparatus in far-red  
674 light. *Science (80-. )*. **345**, 1312–1317 (2014) doi:10.1126/science.1256963.
- 675 12. M. Judd, *et al.*, The primary donor of far-red photosystem II: ChlD1 or PD2? *Biochim.*  
676 *Biophys. Acta - Bioenerg.* **1861**, 148248 (2020) doi:10.1016/j.bbabi.2020.148248.
- 677 13. C. J. Gisriel, *et al.*, Structure of a monomeric photosystem II core complex from a  
678 cyanobacterium acclimated to far-red light reveals the functions of chlorophylls d and f. *J.*  
679 *Biol. Chem.* **298**, 101424 (2022) doi:10.1016/j.jbc.2021.101424.
- 680 14. Y. Umena, K. Kawakami, J. R. Shen, N. Kamiya, Crystal structure of oxygen-evolving  
681 photosystem II at a resolution of 1.9Å. *Nature* **473**, 55–60 (2011) doi:10.1038/nature09913.
- 682 15. C. A. R. Cotton, *et al.*, Photosynthetic constraints on fuel from microbes. *Front. Bioeng.*  
683 *Biotechnol.* **3**, 1–5 (2015) doi:10.3389/fbioe.2015.00036.
- 684 16. G. A. Davis, *et al.*, Limitations to photosynthesis by proton motive force-induced photosystem  
685 II photodamage. *Elife* **5**, 1–27 (2016) doi:10.7554/elife.16921.
- 686 17. M. Chen, R. E. Blankenship, Expanding the solar spectrum used by photosynthesis. *Trends*  
687 *Plant Sci.* **16**, 427–431 (2011) doi:10.1016/j.tplants.2011.03.011.
- 688 18. B. Diner, P. Joliot, Effect of the transmembrane electric field on the photochemical and  
689 quenching properties of Photosystem II in vivo. *Biochim. Biophys. Acta - Bioenerg.* **423**, 479–  
690 498 (1976) doi:10.1016/0005-2728(76)90202-4.
- 691 19. P. Joliot, A. Joliot, Dependence of Delayed Luminescence upon Adenosine Triphosphatase  
692 Activity in *Chlorella*. *Plant Physiol.* **65**, 691–696 (1980) doi:10.1104/pp.65.4.691.
- 693 20. A. R. Crofts, C. A. Wraight, The electrochemical domain of photosynthesis. *Biochim. Biophys.*  
694 *Acta - Rev. Bioenerg.* **726**, 149–185 (1983) doi:10.1016/0304-4173(83)90004-6.
- 695 21. I. Vass, D. Kirilovsky, A.-L. Etienne, UV-B Radiation-Induced Donor- and Acceptor-Side

- 696 Modifications of Photosystem II in the Cyanobacterium *Synechocystis* sp. PCC 6803.  
697 *Biochemistry* **38**, 12786–12794 (1999) doi:10.1021/bi991094w.
- 698 22. R. De Wijn, H. J. Van Gorkom, Kinetics of electron transfer from QA to QB in photosystem  
699 II. *Biochemistry* **40**, 11912–11922 (2001) doi:10.1021/bi010852r.
- 700 23. P. J. Nixon, J. T. Trost, B. A. Diner, Role of the carboxy-terminus of polypeptide D1 in the  
701 assembly of a functional water-oxidizing manganese cluster in photosystem II of the  
702 cyanobacterium *Synechocystis* sp. PCC 6803: assembly requires a free carboxyl group at C-  
703 terminal position 344. *Biochemistry* **31**, 10859–10871 (1992) doi:10.1021/bi00159a029.
- 704 24. R. J. Debus, K. A. Campbell, D. P. Pham, A. M. A. Hays, R. D. Britt, Glutamate 189 of the D1  
705 polypeptide modulates the magnetic and redox properties of the manganese cluster and  
706 tyrosine Y(Z) in photosystem II. *Biochemistry* **39**, 6275–6287 (2000) doi:10.1021/bi992749w.
- 707 25. J. Lavergne, Mode of action of 3-(3,4-dichlorophenyl)-1,1-dimethylurea. Evidence that the  
708 inhibitor competes with plastoquinone for binding to a common site on the acceptor side of  
709 Photosystem II. *Biochim. Biophys. Acta - Bioenerg.* **682**, 345–353 (1982) doi:10.1016/0005-  
710 2728(82)90048-2.
- 711 26. K. Cser, Z. Deák, A. Telfer, J. Barber, I. Vass, Energetics of Photosystem II charge  
712 recombination in *Acaryochloris marina* studied by thermoluminescence and flash-induced  
713 chlorophyll fluorescence measurements. *Photosynth. Res.* **98**, 131–140 (2008)  
714 doi:10.1007/s11120-008-9373-3.
- 715 27. A. W. Rutherford, A. R. Crofts, Y. Inoue, Thermoluminescence as a probe of Photosystem II  
716 photochemistry. The origin of the flash-induced glow peaks. *Biochim. Biophys. Acta -  
717 Bioenerg.* **682**, 457–465 (1982) doi:10.1016/0005-2728(82)90061-5.
- 718 28. B. Nöring, D. Shevela, G. Renger, J. Messinger, Effects of methanol on the Si-state transitions  
719 in photosynthetic water-splitting. *Photosynth. Res.* **98**, 251–260 (2008) doi:10.1007/s11120-  
720 008-9364-4.
- 721 29. J. Lavergne, Improved UV-visible spectra of the S-transitions in the photosynthetic oxygen-  
722 evolving system. *Biochim. Biophys. Acta - Bioenerg.* **1060**, 175–188 (1991)  
723 doi:10.1016/S0005-2728(09)91005-2.
- 724 30. M. Sugiura, A. Boussac, T. Noguchi, F. Rappaport, Influence of Histidine-198 of the D1  
725 subunit on the properties of the primary electron donor, P680, of photosystem II in  
726 *Thermosynechococcus elongatus*. *Biochim. Biophys. Acta - Bioenerg.* **1777**, 331–342 (2008)  
727 doi:10.1016/j.bbabi.2008.01.007.
- 728 31. K. Cser, Z. Deák, A. Telfer, J. Barber, I. Vass, Energetics of Photosystem II charge  
729 recombination in *Acaryochloris marina* studied by thermoluminescence and flash-induced  
730 chlorophyll fluorescence measurements. *Photosynth. Res.* **98**, 131–140 (2008)  
731 doi:10.1007/s11120-008-9373-3.
- 732 32. V. Goltsev, I. Zaharieva, P. Chernev, R. J. Strasser, Delayed fluorescence in photosynthesis.  
733 *Photosynth. Res.* **101**, 217–232 (2009) doi:10.1007/s11120-009-9451-1.
- 734 33. A. W. Rutherford, Y. Inoue, Oscillation of delayed luminescence from PS II: recombination of  
735 S2Q-B and S3Q-B. *FEBS Lett.* **165**, 163–170 (1984) doi:10.1016/0014-5793(84)80162-3.
- 736 34. K. Cser, I. Vass, Radiative and non-radiative charge recombination pathways in Photosystem  
737 II studied by thermoluminescence and chlorophyll fluorescence in the cyanobacterium  
738 *Synechocystis* 6803. *Biochim. Biophys. Acta - Bioenerg.* **1767**, 233–243 (2007)  
739 doi:10.1016/j.bbabi.2007.01.022.
- 740 35. G. N. Johnson, A. W. Rutherford, A. Krieger, A change in the midpoint potential of the  
741 quinone QA in Photosystem II associated with photoactivation of oxygen evolution. *BBA -*



- 742 *Bioenerg.* **1229**, 202–207 (1995) doi:10.1016/0005-2728(95)00003-2.
- 743 36. I. Vass, K. Cser, Janus-faced charge recombinations in photosystem II photoinhibition. *Trends*  
744 *Plant Sci.* **14**, 200–205 (2009) doi:10.1016/j.tplants.2009.01.009.
- 745 37. A. Telfer, S. M. Bishop, D. Phillips, J. Barber, Isolated photosynthetic reaction center of  
746 photosystem II as a sensitizer for the formation of singlet oxygen. Detection and quantum  
747 yield determination using a chemical trapping technique. *J. Biol. Chem.* **269**, 13244–13253  
748 (1994) doi:10.1016/s0021-9258(17)36825-4.
- 749 38. M. Grabolle, H. Dau, Efficiency and role of loss processes in light-driven water oxidation by  
750 PSII. *Physiol. Plant.* **131**, 50–63 (2007) doi:10.1111/j.1399-3054.2007.00941.x.
- 751 39. D. Shevela, B. Nöring, H. J. Eckert, J. Messinger, G. Renger, Characterization of the water  
752 oxidizing complex of photosystem II of the Chl d-containing cyanobacterium *Acaryochloris*  
753 *marina* via its reactivity towards endogenous electron donors and acceptors. *Phys. Chem.*  
754 *Chem. Phys.* **8**, 3460–3466 (2006) doi:10.1039/b604389e.
- 755 40. S. I. Allakhverdiev, *et al.*, Redox potentials of primary electron acceptor quinone molecule (Q  
756 A)- and conserved energetics of photosystem II in cyanobacteria with chlorophyll a and  
757 chlorophyll d. *Proc. Natl. Acad. Sci. U. S. A.* **108**, 8054–8058 (2011)  
758 doi:10.1073/pnas.1100173108.
- 759 41. A. W. Rutherford, D. R. Paterson, J. E. Mullet, A light-induced spin-polarized triplet detected  
760 by EPR in Photosystem II reaction centers. *BBA - Bioenerg.* **635**, 205–214 (1981)  
761 doi:10.1016/0005-2728(81)90020-7.
- 762 42. N. Keren, H. Gong, I. Ohad, Oscillations of reaction center II-D1 protein degradation in vivo  
763 induced by repetitive light flashes: Correlation between the level of RCII-Q-B and protein  
764 degradation in low light. *J. Biol. Chem.* **270**, 806–814 (1995) doi:10.1074/jbc.270.2.806.
- 765 43. N. Keren, I. Ohad, A. W. Rutherford, F. Drepper, A. Krieger-Liszky, Inhibition of  
766 Photosystem II activity by saturating single turnover flashes in calcium-depleted and active  
767 Photosystem II. *Photosynth. Res.* **63**, 209–216 (2000) doi:10.1023/A:1006435530817.
- 768 44. M. Sugiura, *et al.*, Energetics in Photosystem II from *Thermosynechococcus elongatus* with a  
769 D1 protein encoded by either the *psbA1* or *psbA3* gene. *Biochim. Biophys. Acta - Bioenerg.*  
770 **1797**, 1491–1499 (2010) doi:10.1016/j.bbabi.2010.03.022.
- 771 45. S. A. P. Merry, *et al.*, Modulation of Quantum Yield of Primary Radical Pair Formation in  
772 Photosystem II by Site-Directed Mutagenesis Affecting Radical Cations and Anions.  
773 *Biochemistry* **37**, 17439–17447 (1998) doi:10.1021/bi980502d.
- 774 46. B. A. Diner, *et al.*, Site-directed mutations at D1-His198 and D2-His197 of photosystem II in  
775 *Synechocystis* PCC 6803: Sites of primary charge separation and cation and triplet  
776 stabilization. *Biochemistry* **40**, 9265–9281 (2001) doi:10.1021/bi010121r.
- 777 47. M. Sugiura, *et al.*, Modification of the pheophytin redox potential in *Thermosynechococcus*  
778 *elongatus* Photosystem II with *PsbA3* as D1. *Biochim. Biophys. Acta - Bioenerg.* **1837**, 139–  
779 148 (2014) doi:10.1016/j.bbabi.2013.09.009.
- 780 48. F. van Mieghem, *et al.*, Charge Recombination Reactions in Photosystem II. 1. Yields,  
781 Recombination Pathways, and Kinetics of the Primary Pair. *Biochemistry* **34**, 4798–4813  
782 (1995) doi:10.1021/bi00014a038.
- 783 49. G. H. Schatz, H. Brock, A. R. Holzwarth, Picosecond kinetics of fluorescence and absorbance  
784 changes in photosystem II particles excited at low photon density. *Proc. Natl. Acad. Sci.* **84**,  
785 8414–8418 (1987) doi:10.1073/pnas.84.23.8414.
- 786 50. H. Dau, K. Sauer, Exciton equilibration and photosystem II exciton dynamics - A fluorescence

- 787 study on photosystem II membrane particles of spinach. *Biochim. Biophys. Acta - Bioenerg.*  
788 **1273**, 175–190 (1996) doi:10.1016/0005-2728(95)00141-7.
- 789 51. R. C. Jennings, G. Elli, F. M. Garlaschi, S. Santabarbara, G. Zucchelli, Selective quenching of  
790 the fluorescence of core chlorophyll-protein complexes by photochemistry indicates that  
791 Photosystem II is partly diffusion limited. *Photosynth. Res.* **66**, 225–233 (2000)  
792 doi:10.1023/A:1010618006889.
- 793 52. N. P. Pawlowicz, M. L. Groot, I. H. M. Van Stokkum, J. Breton, R. Van Grondelle, Charge  
794 separation and energy transfer in the photosystem II core complex studied by femtosecond  
795 midinfrared spectroscopy. *Biophys. J.* **93**, 2732–2742 (2007)  
796 doi:10.1529/biophysj.107.105452.
- 797 53. G. Raszewski, T. Renger, Light harvesting in photosystem II core complexes is limited by the  
798 transfer to the trap: Can the core complex turn into a photoprotective mode? *J. Am. Chem. Soc.*  
799 **130**, 4431–4446 (2008) doi:10.1021/ja7099826.
- 800 54. M. Kaucikas, K. Maghlaoui, J. Barber, T. Renger, J. J. Van Thor, Ultrafast infrared  
801 observation of exciton equilibration from oriented single crystals of photosystem II. *Nat.*  
802 *Commun.* **7**, 1–8 (2016) doi:10.1038/ncomms13977.
- 803 55. G. H. Schatz, H. Brock, A. R. Holzwarth, Kinetic and Energetic Model for the Primary  
804 Processes in Photosystem II. *Biophys. J.* **54**, 397–405 (1988) doi:10.1016/S0006-  
805 3495(88)82973-4.
- 806 56. M. Chen, T. S. Bibby, J. Nield, A. W. D. Larkum, J. Barber, Structure of a large photosystem  
807 II supercomplex from *Acaryochloris marina*. *FEBS Lett.* **579**, 1306–1310 (2005)  
808 doi:10.1016/j.febslet.2005.01.023.
- 809 57. F. Rappaport, J. Lavergne, Thermoluminescence: Theory. *Photosynth. Res.* **101**, 205–216  
810 (2009) doi:10.1007/s11120-009-9437-z.
- 811 58. E. C. M. Engelmann, G. Zucchelli, F. M. Garlaschi, A. P. Casazza, R. C. Jennings, The effect  
812 of outer antenna complexes on the photochemical trapping rate in barley thylakoid  
813 Photosystem II. *Biochim. Biophys. Acta - Bioenerg.* **1706**, 276–286 (2005)  
814 doi:10.1016/j.bbabi.2004.11.009.
- 815 59. N. Zamzam, *et al.*, Femtosecond visible transient absorption spectroscopy of chlorophyll- f -  
816 containing photosystem II. *Proc. Natl. Acad. Sci.* **117**, 23158–23164 (2020)  
817 doi:10.1073/pnas.2006016117.
- 818 60. V. Mascoli, L. Bersanini, R. Croce, Far-red absorption and light-use efficiency trade-offs in  
819 chlorophyll f photosynthesis. *Nat. Plants* **6**, 1044–1053 (2020) doi:10.1038/s41477-020-0718-  
820 z.
- 821 61. G. A. Davis, A. W. Rutherford, D. M. Kramer, Hacking the thylakoid proton motive force for  
822 improved photosynthesis: modulating ion flux rates that control proton motive force  
823 partitioning into  $\Delta\psi$  and  $\Delta\text{pH}$ . *Philos. Trans. R. Soc. B Biol. Sci.* **372**, 20160381 (2017)  
824 doi:10.1098/rstb.2016.0381.
- 825 62. A. Murakami, H. Miyashita, M. Iseki, K. Adachi, M. Mimuro, Chlorophyll d in an Epiphytic  
826 Cyanobacterium of Red Algae. *Science (80-. )*. **303**, 1633 (2004)  
827 doi:10.1126/science.1095459.
- 828 63. S. R. Miller, *et al.*, Discovery of a free-living chlorophyll d -producing cyanobacterium with a  
829 hybrid proteobacterial/cyanobacterial small-subunit rRNA gene. *Proc. Natl. Acad. Sci.* **102**,  
830 850–855 (2005) doi:10.1073/pnas.0405667102.
- 831 64. M. Kühn, M. Chen, P. J. Ralph, U. Schreiber, A. W. D. Larkum, Ecology: A niche for  
832 cyanobacteria containing chlorophyll d. *Nature* **433**, 820 (2005) doi:10.1038/433820a.

- 833 65. R. Mohr, *et al.*, A new chlorophyll d-containing cyanobacterium: Evidence for niche  
834 adaptation in the genus *Acaryochloris*. *ISME J.* **4**, 1456–1469 (2010)  
835 doi:10.1038/ismej.2010.67.
- 836 66. B. Bailleul, *et al.*, The thermodynamics and kinetics of electron transfer between cytochrome  
837 b6f and photosystem I in the chlorophyll d-dominated cyanobacterium, *Acaryochloris marina*.  
838 *J. Biol. Chem.* **283**, 25218–25226 (2008) doi:10.1074/jbc.M803047200.
- 839 67. R. Rippka, J. Deruelles, J. B. Waterbury, Generic assignments, strain histories and properties  
840 of pure cultures of cyanobacteria. *J. Gen. Microbiol.* **111**, 1–61 (1979) doi:10.1099/00221287-  
841 111-1-1.
- 842 68. S. De Causmaecker, “Bioenergetic Studies on the Quinone Electron Acceptors of Photosystem  
843 II.” (2018) doi:10.25560/68272.
- 844 69. P. L. Dilbeck, *et al.*, The D1-D61N mutation in *Synechocystis* sp. PCC 6803 allows the  
845 observation of pH-sensitive intermediates in the formation and release of O<sub>2</sub> from  
846 photosystem II. *Biochemistry* **51**, 1079–1091 (2012) doi:10.1021/bi201659f.
- 847 70. P. Joliot, D. Béal, F. Rappaport, “A New High-Sensitivity 10-ns Time-Resolution  
848 Spectrophotometric Technique Adapted to In Vivo Analysis of the Photosynthetic Apparatus”  
849 in *Photosynthesis: Mechanisms and Effects*, (Springer Netherlands, 1998), pp. 4247–4252  
850 doi:10.1007/978-94-011-3953-3\_983.
- 851
- 852
