# Supplementary material for: Impact of energy limitations on function and resilience in long-wavelength Photosystem II
Source: bioRxiv or medRxiv preprint supplement (doi:10.1101/2022.04.05.486971), 2022-04-30
Supplement: Supplementary file [file media-1.pdf]

1 Supplementary Information

2 **Impact of energy limitations on function and resilience in long-wavelength Photosystem II**

3 *Stefania Viola<sup>a\*</sup>, William Roseby<sup>a</sup>, Stefano Santabarabara<sup>b#</sup>, Dennis Nürnberg<sup>c</sup>, Ricardo Assunção<sup>c</sup>,*  
4 *Holger Dau<sup>c</sup>, Julien Sellés<sup>d</sup>, Alain Boussac<sup>e</sup>, Andrea Fantuzzi<sup>a</sup>, A William Rutherford<sup>a\*</sup>*

5

6 <sup>a</sup>Department of Life Sciences, Imperial College, SW7 2AZ London, UK

7 <sup>b</sup>Photosynthesis Research Unit, Consiglio Nazionale delle Ricerche, 20133 Milano, Italy

8 <sup>c</sup>Physics Department, Freie Universität Berlin, 14195 Berlin, Germany

9 <sup>d</sup>Institut de Biologie Physico-Chimique, UMR CNRS 7141 and Sorbonne Université, 75005 Paris,  
10 France

11 <sup>e</sup>Institut de Biologie Intégrative de la Cellule, UMR9198, CEA Saclay, 91191 Gif-Sur-Yvette, France

12

13 \*Corresponding Authors:

14 A.W. Rutherford, Department of Life Sciences, Imperial College London, London SW7 2AZ, UK,  
15 Tel +44 2075945329

16 **E-mail:** [a.rutherford@imperial.ac.uk](mailto:a.rutherford@imperial.ac.uk)

17 S. Viola, Department of Life Sciences, Imperial College London, London SW7 2AZ, UK, Tel +44  
18 2075941778

19 **E-mail:** [s.viola@imperial.ac.uk](mailto:s.viola@imperial.ac.uk)

20

21 **#present address:** Istituto di Biologia e Biotecnologia Agraria, Consiglio Nazionale delle Ricerche,  
22 20133, Milan, Italy

23

24 **This PDF files includes:**

25

26

27 Supplementary text

28 Supplementary data: Figures S1-S14

29 Tables S1-S5

30

31 References for SI citations

32

### 33 **Supplementary materials and methods**

#### 34 *Isolation of membranes*

35 Cells were harvested by centrifugation at 6,000 x g for 5 min and resuspended in ice-cold buffer (50  
36 mM MES-NaOH pH 6.5, 5 mM CaCl<sub>2</sub>, 10 mM MgCl<sub>2</sub>, 1.2 M betaine and 20% v/v glycerol) with a  
37 protease inhibitor mixture (1 mM aminocaproic acid, 1 mM benzamidine, and 0.2 % (w/v) bovine  
38 serum albumin) and 0.5 mg ml<sup>-1</sup> DNaseI. All following steps were performed on ice under dim green  
39 light. *A. marina* and *C. thermalis* cells were broken by two passages through a cell disruptor (Constant  
40 System, Model T5) at a pressure of 25 kPsi. *Synechocystis* cells were broken with bursts of vortexing  
41 with glass beads. Unbroken cells were removed by centrifugation for 5 min at 1,000 x g, 4°C.  
42 Membranes were pelleted by centrifugation at 125,000 x g and 4°C for 30 min and washed three times  
43 with resuspension buffer. Membranes were resuspended in resuspension buffer, frozen in liquid  
44 nitrogen and stored at -80°C.

#### 45 *Removal of Mn-cluster by Tris-washing of membranes*

46 *A. marina* membranes were diluted in ice-cold 1 M Tris pH 9.5 plus 3 mM EDTA to a final  
47 chlorophyll concentration of 190 µg ml<sup>-1</sup> and incubated on ice under ambient light with continuous  
48 stirring for 30 min at 4°C. The membranes were then washed twice in ice-cold resuspension buffer  
49 (the same used for membrane isolation) and finally resuspended in the same.

#### 50 *Analysis of Q<sub>A</sub><sup>-</sup> reoxidation kinetics as measured by fluorescence*

51 The flash-induced chlorophyll fluorescence curves were fitted with a linear combination of two  
52 exponentials (fast and middle phase) and a hyperbolic component (slow phase), where F<sub>t</sub> is the  
53 variable fluorescence yield, F<sub>0</sub> is the basic fluorescence level before the flash, A<sub>1</sub>–A<sub>3</sub> are the  
54 amplitudes and T<sub>1</sub>–T<sub>3</sub> are the time-constants, based on (1, 2).

$$55 \quad F_t - F_0 = A_1 \cdot \exp(-t/T_1) + A_2 \cdot \exp(-t/T_2) + A_3 / (1 + t/T_3) \quad \text{Eq.1}$$

56 In order to better resolve the µs to ms components associated with forward electron transfer from Q<sub>A</sub><sup>-</sup>  
57 to Q<sub>B</sub> or Q<sub>B</sub><sup>-</sup>, the same curves but truncated at 1 s were fitted using a three exponentials decay and an  
58 off-set (y<sub>0</sub>) accounting for the non-decaying signal in the time-window:

$$59 \quad F_t - F_0 = A_1 \cdot \exp(-t/T_1) + A_2 \cdot \exp(-t/T_2) + A_3 \cdot \exp(-t/T_3) + y_0 \quad \text{Eq.2}$$

60 The curves obtained in presence of 20 µM DCMU (3-(3,4-dichlorophenyl)-1,1-dimethylurea) could  
61 be fitted with two phases (one exponential and one hyperbolic) for *A. marina* and three phases (two  
62 exponentials and one hyperbolic) for WL and FR *C. thermalis*, because of the presence in both types  
63 of *C. thermalis* samples of a small initial fast phase, which probably corresponds to a small fraction of  
64 PSII centers where DCMU did not bind, as previously suggested (3).

65 *Thermoluminescence and luminescence*

66 For the S<sub>2</sub>Q<sub>A</sub><sup>-</sup> and S<sub>2</sub>Q<sub>B</sub><sup>-</sup> TL measurements, samples were cooled to -20°C and excited with a single  
67 turnover saturating laser flash (Continuum Minilite II, frequency doubled to 532 nm, 5 ns FWHM).  
68 The samples were then incubated in the dark at -20°C for 30 s, before heating from -20°C to 80°C at  
69 1°C s<sup>-1</sup>. The amplitudes of the TL peaks were normalized on the basis of the maximal oxygen  
70 evolution rates measured for each sample. For the measurement of the flash-dependence of TL, the  
71 samples were cooled to 4°C and excited with a single or multiple saturating laser flashes fired at 1 s  
72 time intervals. Samples were then heated from 4°C to 80°C at 1°C s<sup>-1</sup>.

73 S<sub>2</sub>Q<sub>A</sub><sup>-</sup> luminescence decay measurements were performed at a constant ( $\Delta T < 0.2^\circ\text{C}$ ) temperature of  
74 either 10, 20 or 30°C in presence of 20  $\mu\text{M}$  DCMU. The samples were pre-equilibrated for 10 s in  
75 darkness at the given temperature before being excited with a single turnover saturating laser flash.  
76 Luminescence was then recorded from 570 ms to 300 s after the flash. The total luminescence  
77 emission was calculated as the integrated area below the decay curves normalized on the basis of the  
78 maximal oxygen evolution rates measured for each sample. The measured curves were fitted with a  
79 linear combination of three exponential components where L is the luminescence, A<sub>1</sub>–A<sub>3</sub> are the  
80 amplitudes and T<sub>1</sub>–T<sub>3</sub> are the lifetimes.

81 
$$L(t) = A_1 \cdot \exp(-t/T_1) + A_2 \cdot \exp(-t/T_2) + A_3 \cdot \exp(-t/T_3) \quad \text{Eq.3}$$

82 The average decay lifetime was calculated from the exponential components 2 and 3 as follows:

83 
$$\tau_{av} = \sum_i A_i T_i / \sum_i A_i \quad \text{Eq.4}$$

84 The contribution of each luminescence decay component to the total luminescence emission was  
85 calculated as

86 
$$L_i = A_i T_i / \sum_i A_i \cdot T_i \quad \text{Eq.5}$$

87 *UV transient absorption*

88 In the UV pump-probe absorption measurements performed using a lab-built Optical Parametric  
89 Oscillator (OPO)-based spectrophotometer, the single-turnover excitation flashes were provided by a  
90 Nd:YAG laser (Surelite II, Amplitude Technologies) at 532 nm, which pumped an OPO (Surelite  
91 OPO plus) producing monochromatic saturating flashes (6 ns FWHM) at the indicated wavelengths.  
92 The power of the flashes at the wavelengths used, measured at the level of the laser output, was: 2.7  
93 mJ at 680 nm, 2.7 mJ at 720 nm, 3.8 mJ at 727 nm, 3.3 mJ at 734 nm, 3.7 mJ at 737 nm, 4 mJ at 749  
94 mJ. The optics components between the laser output and the cuvettes containing the sample induce  
95 the same attenuation at all wavelengths. When indicated, the flash intensity was attenuated by 17%

96 using a metal grid. Detecting flashes were provided by an OPO (Horizon OPO, Amplitude  
97 Technologies) pumped by a frequency tripled Nd:YAG laser (Surelite II, Amplitude Technologies),  
98 producing monochromatic flashes (291 nm, 2 nm full-width at half-maximum) with a duration of 5 ns.  
99 The time delay between the laser delivering the excitation flashes and the laser delivering the  
100 detecting flashes was controlled by a digital delay/pulse generator (DG645, Stanford Research). The  
101 light-detecting photodiodes were protected from transmitted and scattered actinic light and  
102 fluorescence by BG39 Schott (Mainz, Germany) filters.

### 103 *Flash-dependent oxygen evolution with Joliot electrode*

104 For each measurement, membranes equivalent to 10  $\mu\text{g}$  of total chlorophyll, brought to 750  $\mu\text{l}$  with  
105 buffer A (150 mM NaCl, 25 mM MES, 1 M glycine betaine, 5 mM  $\text{MgCl}_2$ , and 5 mM  $\text{CaCl}_2$ , pH 6.2)  
106 were deposited on the electrode assembly, which was then centrifuged in a swing-out rotor at 10,000  
107  $\times g$  for 10 min (at 4  $^\circ\text{C}$ ). Using a home-built potentiostat, which provided an electrode polarization of  
108 -0.95 V (switched on 15 s before the first excitation flash), the current signal was recorded 20 ms  
109 before and 480 ms after each light flash, for a total of 40 flashes with a flash-spacing of 900 ms. The  
110 current signal reflects the  $\text{O}_2$  reduction process at the bare platinum electrode. Three different light  
111 sources were used to induce the S-state transitions: a custom-made LED flashing device with two  
112 changeable high-performance LEDs (Luminus) and a Xenon flashlamp (EG&G Optoelectronics). The  
113 LEDs had emission peaks in the red and far-red (613 nm and 730 nm respectively) and the flashlamp  
114 was equipped with 570 nm cut-off filter suppressing shorter wavelengths and thereby photoelectric  
115 artefacts. The total energy per light flash was determined with a 1  $\text{cm}^2$  power meter (Ophir Photonics)  
116 at the exit of the light guide, which conveyed the light to the sample. The energy of the LED flashes  
117 (40  $\mu\text{s}$  FWHM) was 270  $\mu\text{J}$  for the red LED and 210  $\mu\text{J}$  for the far-red LED, whereas for the  
118 flashlamp pulse (10  $\mu\text{s}$  FWHM) it was 540  $\mu\text{J}$ . During the data acquisition the sample was kept at 20  
119  $^\circ\text{C}$  using a Peltier and monitored by a temperature sensor immersed in the sample buffer.

120

121

122

123

124

125

126

127

128

129

130 **Supplementary material on fluorescence decay kinetics (section 2.1 of main text)**

131

| No addition (1 s) <sup>a</sup> |                                          |                                            |                                         |
|--------------------------------|------------------------------------------|--------------------------------------------|-----------------------------------------|
| Strain                         | Fast phase<br>T <sub>1</sub> /Amp (ms/%) | Middle phase<br>T <sub>2</sub> /Amp (ms/%) | Slow phase<br>T <sub>3</sub> /Amp (s/%) |
| <i>A. marina</i>               | 0.58±0.21 / 26±5                         | 4.9±1.3 / 32±5                             | — / 42±3**                              |
| WL <i>C. thermalis</i>         | 0.50±0.09 / 32±3                         | 3.7±0.4 / 37 ±4                            | — / 31±2                                |
| FR <i>C. thermalis</i>         | 0.53±0.16 / 26±4                         | 4.7±0.7 / 45±4                             | — / 30±3                                |
| DCMU (100s) <sup>b</sup>       |                                          |                                            |                                         |
| Strain                         | Not bound<br>T <sub>1</sub> /Amp (ms/%)  | Middle phase<br>T <sub>2</sub> /Amp (s/%)  | Slow phase<br>T <sub>3</sub> /Amp (s/%) |
| <i>A. marina</i>               | — / —                                    | 0.98±0.58 / 19±8                           | 6.5±1.0 / 81±8                          |
| WL <i>C. thermalis</i>         | 2.0±0.9 / 5±1                            | 0.25±0.04 / 17±1                           | 6.9±0.3 / 78±1                          |
| FR <i>C. thermalis</i>         | 2.7±0.9 / 6±1                            | 1.31±0.35** / 14±3                         | 10.4±0.8** / 80±3                       |

132

133 Table S1. Time constants and relative amplitudes (%) of the different phases of fluorescence decay obtained by  
 134 fitting the data in Fig. 2. Statistically significant differences according to Student's t-tests are indicated with  
 135 asterisks \*\*p ≤ 0.01).

136 <sup>a</sup> The decay kinetics measured over 100 s in samples with no additions were truncated at 1 s and fitted with a  
 137 three exponential equation allowing  $y_0$  to account for the part decaying in >1 s.

138 <sup>b</sup> The data recorded in the presence of DCMU over a period of 100 s were fitted with two exponentials (only one  
 139 in the case of *A. marina*) and one hyperbole.

140

141

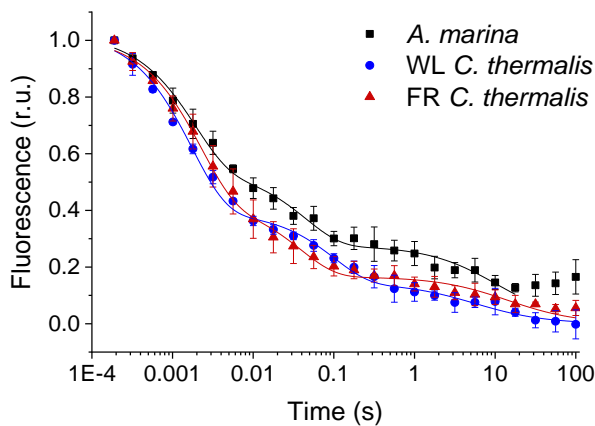

142

143 Fig. S1. Fluorescence decay kinetics after a short saturating light pulse in isolated membranes of *A. marina*, WL  
 144 *C. thermalis* and FR *C. thermalis*. These are the same traces as in Fig. 2A but here including all points up to 100 s.  
 145 The datapoints represent the averages of three biological replicates, ± s.d., while the lines represent the fits of  
 146 the experimental data. All traces are normalized on the initial variable fluorescence ( $F_m - F_0$ , with  $F_m$  measured  
 147 190  $\mu$ s after the saturating flash).

| No addition 100 s      |                            |                            |                           |
|------------------------|----------------------------|----------------------------|---------------------------|
| Strain                 | Fast phase                 | Middle phase               | Slow phase                |
|                        | T <sub>1</sub> /Amp (ms/%) | T <sub>2</sub> /Amp (ms/%) | T <sub>3</sub> /Amp (s/%) |
| <i>A. marina</i>       | 1.8±0.3 / 47±3***          | 44.7±11.2 / 26±3           | 10.8±2.6* / 27±1****      |
| WL <i>C. thermalis</i> | 1.7±0.2 / 62±2             | 99.8±23.5* / 24±2          | 5.6±2.4 / 14±2            |
| FR <i>C. thermalis</i> | 2.2±0.3 / 58±3             | 38.7±10.3 / 26±3           | 14.3±4.6* / 16±1          |

149

150 Table S2. Time-constants and relative amplitudes of the different phases of fluorescence decay obtained by  
 151 fitting the data in Figure S1. The decay kinetics recorded over a period of 100 s were fitted with two  
 152 exponentials and one hyperbole. In the case of *A. marina*, fitting of the fluorescence decay kinetics in Fig. S1  
 153 were done by excluding the datapoints between 30 and 100 s after flash, because of the presence of a non-  
 154 decaying fluorescence that likely arises from a fraction of centers devoid of an intact Mn-cluster. Statistically  
 155 significant differences according to Student's t-tests are indicated with asterisks (\*p ≤ 0.05, \*\*\*p ≤ 0.001,  
 156 \*\*\*\*p ≤ 0.0001).

157

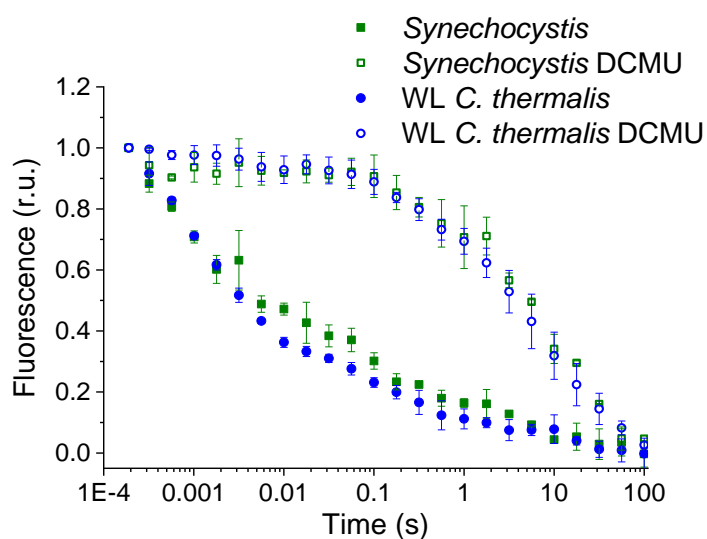

158

159 Fig. S2. Fluorescence decay kinetics after a short saturating light pulse in isolated membranes of *Synechocystis*  
 160 and WL *C. thermalis* in absence and presence of DCMU. The WL *C. thermalis* data are the same as those in Fig. 2  
 161 and S1. The *Synechocystis* datapoints represent the averages of two biological replicates, ± s.d.. All traces are  
 162 normalized on the initial variable fluorescence ( $F_m - F_0$ , with  $F_m$  measured 190 μs after the saturating flash).

163 The fluorescence decay kinetics measured here in *Synechocystis* membranes, as well as those  
 164 measured in *A. marina* and *C. thermalis* membranes, are faster than those measured in *Synechocystis*  
 165 intact cells in previous works (4). Additionally, a study of fluorescence decay times was previously  
 166 reported comparing  $Q_A^-$  lifetimes in *A. marina* and *Synechocystis* but in cells rather than membranes.  
 167 In *A. marina* cells the forward ( $Q_A^-$  to  $Q_B$ ) electron transfer rate was slower than in *Synechocystis*

168 cells, while the  $S_2Q_A^-$  recombination rate *A. marina* cells was faster than in *Synechocystis* cells (5). In  
169 both organisms, the fluorescence decay kinetics were faster than the values measured here in  
170 membranes. The faster rates in cells compared to isolated membranes are intrinsic to the type of  
171 sample used. The transmembrane electric field, which is present in cells but not in isolated  
172 membranes, is known to accelerate  $Q_A^-$  decay both in the absence (6) and presence of DCMU (7).  
173 Additionally, the faster rates for  $Q_A^-$  to  $Q_B$  electron transfer in cells may be attributed to the  $Q_B$  site in  
174 living cells functioning optimally at higher pH rather than at the pH 6.5 used here to maintain PSII  
175 donor-side function.

176

### 177 **Supplementary material on the S-state turnover efficiency (section 2.2 of main text)**

#### 178 *Flash dependence of thermoluminescence.*

179 Fig. S3 shows the TL emission after a series of saturating flashes in *A. marina* (panels A, D and G),  
180 WL *C. thermalis* (panels B, E and H) and FR *C. thermalis* (panels C, F and I) membranes. Although  
181 no major differences in the flash patterns could be observed between the three samples, the flash  
182 dependence of the TL peak intensities (panels A, B and C) and their peak temperatures (panels D, E  
183 and F) showed variability between biological replicates. Representative TL glow curves obtained in  
184 one biological replicate for each sample after 1 to 6 flashes are shown in Fig. S3G-I. The differences  
185 in the flash patterns between replicates are easily explained by a variability in both the  $S_0/S_1$  and  
186  $Q_B/Q_B^-$  ratios present in the dark before the first flash (8).

187 For WL *C. thermalis*, the smaller TL amplitude makes the peak temperature more difficult to estimate  
188 very precisely. For FR *C. thermalis*, a progressive broadening of the TL peak with increasing flash  
189 number made quantification less reliable, and for *A. marina* an increase in the baseline at high  
190 temperatures (also occurring to a smaller extent but still visible in WL *C. thermalis*) added to the  
191 difficulties in estimating the area of the TL peaks. For these reasons, the TL data are not precise  
192 enough to quantify potential differences in the S-state turnover efficiency in the different types of  
193 PSII, although they show that any such differences, if present, must be small (from the data in Fig.  
194 S3A, B and C).

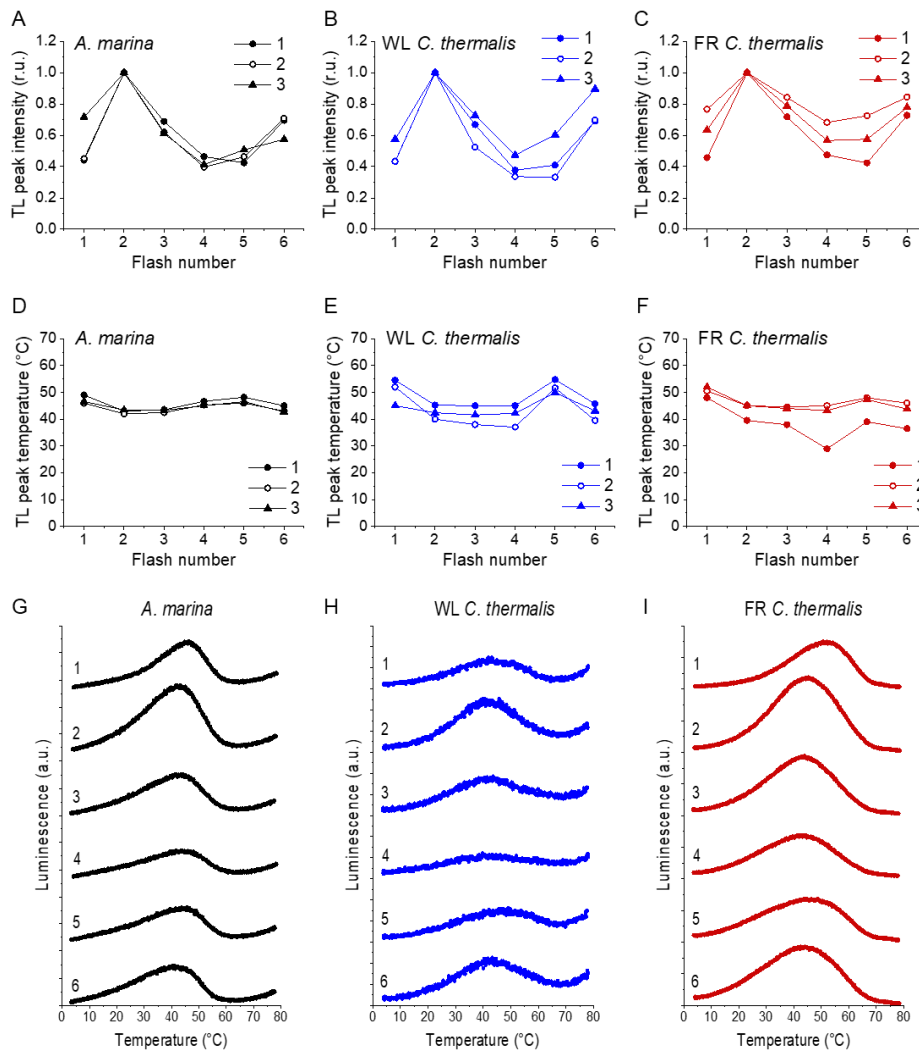

195

196 Fig. S3. Plots of the flash-induced oscillations of the thermoluminescence peak amplitudes (A, B and C) and  
 197 temperatures (D, E and F) measured in *A. marina*, *WL C. thermalis* and *FR C. thermalis* membranes. The TL peak  
 198 amplitudes and temperatures are plotted as a function of the number of flashes given before measuring the  
 199 thermoluminescence glow curve. Peak amplitudes were normalized to the amplitude value measured after 2  
 200 flashes. The membranes, at a final concentration of  $5 \mu\text{g Chl ml}^{-1}$ , were pre-illuminated for  $\sim 10$  s at room  
 201 temperature and subsequently dark-adapted on ice for 1 h before the measurements. The flashes were fired at  
 202  $4^\circ\text{C}$  at 1 s time intervals, and the samples were then heated from 4 to  $80^\circ\text{C}$  at  $1^\circ\text{C s}^{-1}$ . Each series of data points  
 203 corresponds to the TL amplitudes and temperatures measured in an independent biological replicate  
 204 (numbered 1 to 3). (G, H and I) Representative thermoluminescence glow curves recorded after a train of  
 205 flashes (from 1 to 6, as indicated by the number next to each curve) in one of the three membrane samples in  
 206 panels A-F for each strain.

207

208

209



210 *Flash-induced S-state turnover measured in the UV.*

211 Figure S4 shows the fit of the flash-induced absorption changes at 291 nm that reflect the progression  
212 through the S-states of the Mn-cluster (9, 10). The data are those reported in Fig. 4: absorption  
213 changes measured in *T. elongatus* PsbA3-PSII cores with excitation at 680 nm, in *A. marina*  
214 membranes with excitation at 680 nm and in partially purified Chl-f-PSII cores from FR *C. thermalis*  
215 with excitation at 680 and 750 nm. The measurements were performed in presence of PPBQ, with  
216 intervals of 300 ms between the flashes.

217 The fit was done by taking the absorption changes corresponding to the  $S_0 \rightarrow S_1$ ,  $S_1 \rightarrow S_2$  and  $S_2 \rightarrow S_3$   
218 transitions determined in *T. elongatus* with the procedure established by Lavergne (11), and  
219 multiplying them by a factor  $\gamma$  which corresponds to the ratio in active PSII per chlorophyll of the  
220 given sample with respect to the *T. elongatus* sample. It is of note that the factor  $\gamma$  indicates the  
221 fraction of active PSII centers over the total PSII present only when comparing isolated cores, while  
222 in the data reported here, in which partially purified  $O_2$ -evolving Chl-f-PSII cores and *A. marina*  
223 membranes were used, it merely reflects the amounts of active PSII present in those samples for a  
224 given chlorophyll concentration. Since the measurements were done by using single-turnover  
225 excitation flashes (6 ns FWHM), the double-hit parameter  $\beta$  was considered to be zero. Using the  
226 formula developed by Lavorel (10), the miss parameter  $\alpha$  and the proportion of the centers in  $S_1$  state  
227 in the dark-adapted samples could be calculated. In these fits, the absorption changes on the first flash  
228 of the sequence was not taken into account because they may contain a non-oscillating component  
229 (11). The misses were comparable in all samples (~10%), and in the Chl-f-PSII cores from FR *C.*  
230 *thermalis* they did not significantly increase when using 750 nm excitation flashes.

231 The fits in Fig. S4 indicate that the proportion of centers in  $S_1$  in the dark-adapted samples was 75%  
232 in the *A. marina* and FR *C. thermalis* samples but 100% in the *T. elongatus* PsbA3-PSII cores. All  
233 samples were pre-illuminated in ambient light for ~10s and then dark-adapted for >1 hour before the  
234 measurements and were therefore expected to be in 100%  $S_1$  at the start of the flash sequence, with  
235 ~75% of the centers having TyrD\* and ~25% having TyrD (12). It has been shown that TyrD can  
236 reduce the  $S_2$  and  $S_3$  oxidation states of the Mn-cluster (13): in samples having starting populations of  
237 75% TyrD\* $S_1$  and 25% TyrD $S_1$ , some of the  $S_2$  and  $S_3$  states generated during the flash sequence will  
238 be re-reduced to  $S_1$  and  $S_2$ , respectively, in centers where TyrD is present. This process will result in  
239 the apparent presence of 25%  $S_0$  in the dark-adapted sample. This effect has been shown to depend on  
240 the spacing between excitation flashes (14): if the time between the flashes is not long enough to  
241 allow for TyrD donation, the flash pattern will reflect the initial presence of 100%  $S_1$  (12). At room  
242 temperature, electron donation from TyrD is slower in *T. elongatus* PSII than in plant PSII (15): this  
243 could reflect the fact that *T. elongatus* is a thermophile and mesophilic cyanobacterial species such as  
244 *A. marina* and *C. thermalis* could be expected to have TyrD oxidation kinetics more similar to plants,  
245 thus explaining the difference in  $S_1$  populations in our fits.

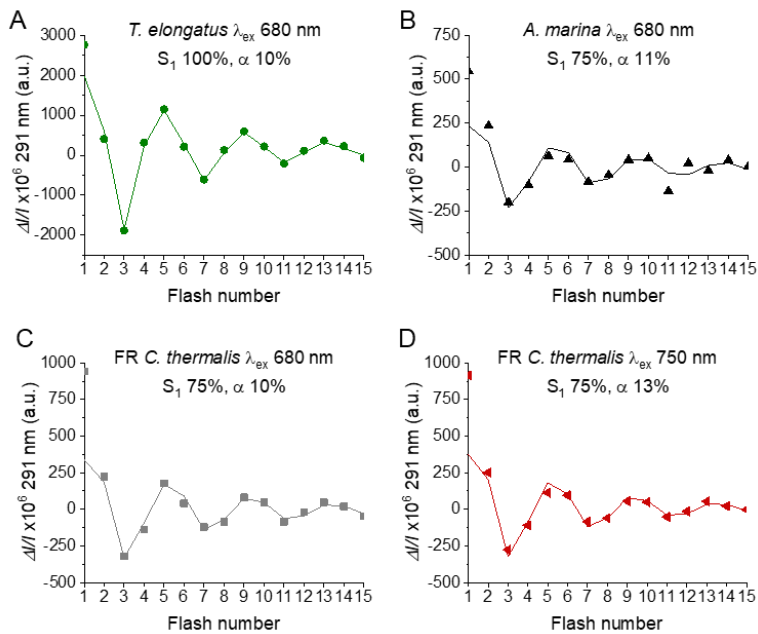

246

247 Fig. S4. Fits of the flash-induced S-state turnover measured as absorption changes at 291 nm in *T. elongatus*  
 248 PsbA3-PSII cores (A), *A. marina* membranes (B) and FR *C. thermalis* PSII cores (C) with laser excitation at 680 nm  
 249 and in FR *C. thermalis* PSII cores with laser excitation at 750 nm (D). Absorption changes were measured at 100  
 250 ms after each of a series of saturating flashes fired with a 300 ms time interval. The data are the same as those  
 251 reported in Fig. 4, while the lines represent the fits of the experimental data. The initial fraction of PSII in S<sub>1</sub>  
 252 state and the miss factors are indicated (in %).

253

#### 254 **Supplementary material on thermoluminescence (section 2.3 of main text)**

255 Fig. S5 shows the plots of the peak amplitudes and temperature of the thermoluminescence arising  
 256 from S<sub>2</sub>Q<sub>B</sub><sup>-</sup> and S<sub>2</sub>Q<sub>A</sub><sup>-</sup> in the three types of PSII. As mentioned in the main text, although our data fit  
 257 qualitatively with earlier reports (5, 16), there is a degree of variability in both amplitude and  
 258 temperature between biological replicates. Consequently, the average values reported in Table S3  
 259 present relatively high standard deviations. The variability in TL intensity between different  
 260 membrane samples could depend on differences in the Q<sub>B</sub>/Q<sub>B</sub><sup>-</sup> ratios and distribution of S states  
 261 present in the dark before applying the single-turnover flash (8).

262 These variabilities between biological replicates could also partially explain slight discrepancies  
 263 between the data reported here and those in (16) regarding the ratio of luminescence intensity between  
 264 the Chl-f-PSII and the Chl-a-PSII. In Nürnberg et al. (16) the luminescence from both S<sub>2</sub>Q<sub>B</sub><sup>-</sup> and  
 265 S<sub>2</sub>Q<sub>A</sub><sup>-</sup> were reported to be >25 times higher in FR *C. thermalis* membranes than in WL *C. thermalis*  
 266 membranes, while the data reported here indicate that the luminescence of FR *C. thermalis* is between  
 267 5 and 16 times higher than in WL *C. thermalis* in the case of the S<sub>2</sub>Q<sub>B</sub><sup>-</sup> recombination, and between 3  
 268 and 15 times higher in the case of the S<sub>2</sub>Q<sub>A</sub><sup>-</sup> recombination. In the present work all measurements

269 were performed at constant chlorophyll concentrations ( $5 \mu\text{g Chl ml}^{-1}$  in the case of *A. marina* and FR  
 270 *C. thermalis*,  $10 \mu\text{g ml}^{-1}$  in the case of WL *C. thermalis*), while in Nürnberg et al. the FR *C. thermalis*  
 271 membranes were diluted to achieve a signal intensity comparable to that obtained in WL *C. thermalis*  
 272 membranes. Although the dilution factor was included in the normalization on the  $\text{O}_2$  evolution  
 273 activities, these differences in the protocols used could contribute to the quantitative discrepancies,  
 274 together with the biological variability, as at higher chlorophyll concentrations sample self-absorption  
 275 can occur, thus skewing the measured TL intensity.

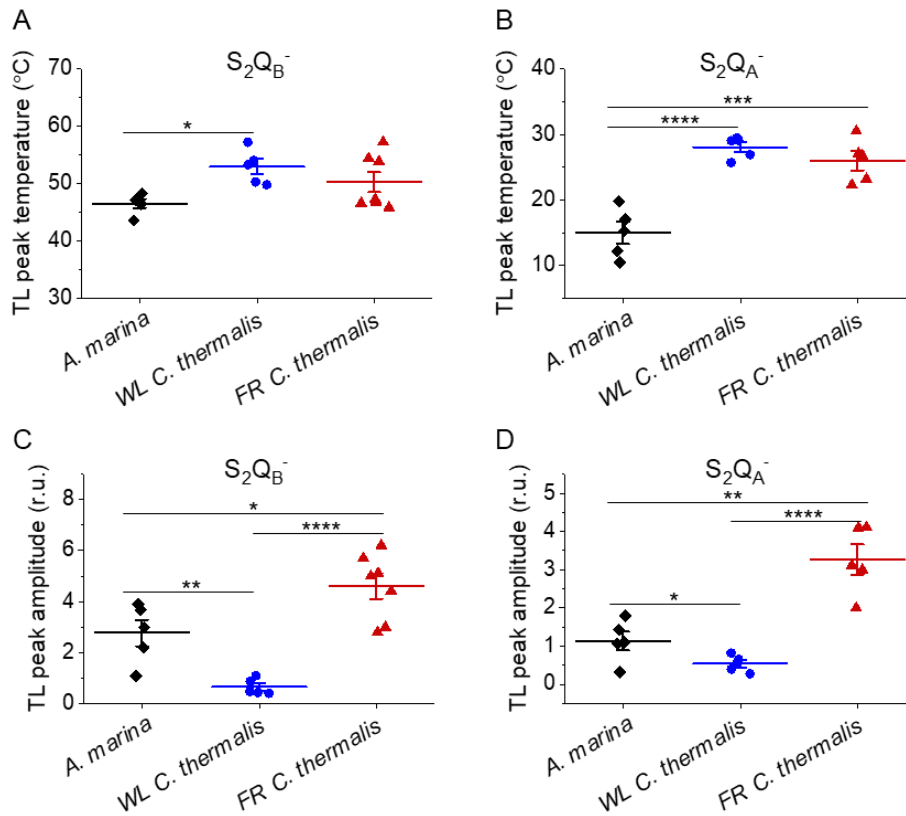

276  
 277 Fig. S5. Thermoluminescence in *A. marina*, WL *C. thermalis* and FR *C. thermalis* membranes. Plots of the  
 278 temperatures (A and B) and of the normalized amplitudes (C and D) of the thermoluminescence peaks deriving  
 279 from  $\text{S}_2\text{Q}_\text{B}^-$  and from  $\text{S}_2\text{Q}_\text{A}^-$  back-reaction, including the examples shown in Fig. 5A and B. Each point represents  
 280 an independent biological replicate, the horizontal lines represent the mean values,  $\pm$  standard error (for  $\text{S}_2\text{Q}_\text{B}^-$ :  
 281 *A. marina* n=5, WL *C. thermalis* n=5, FR *C. thermalis* n=7; for  $\text{S}_2\text{Q}_\text{A}^-$ : *A. marina* n=5, WL *C. thermalis* n=5, FR *C.*  
 282 *thermalis* n=5). Statistically significant differences according to Student's t-tests are indicated with asterisks (\*p  
 283  $\leq 0.05$ , \*\*p  $\leq 0.01$ , \*\*\*p  $\leq 0.001$ , \*\*\*\*p  $\leq 0.0001$ ).

284  
 285  
 286  
 287  
 288

| Strain                 | $S_2Q_B^-$ |            | $S_2Q_A^-$ |            | $\Delta T$ (°C) |
|------------------------|------------|------------|------------|------------|-----------------|
|                        | T (°C)     | Amp (r.u.) | T (°C)     | Amp (r.u.) |                 |
| <i>A. marina</i>       | 46.5±1.8   | 2.77±1.15  | 14.9±3.7   | 1.15±0.55  | 31.5±2.8*       |
| WL <i>C. thermalis</i> | 52.9±3     | 0.65±0.31  | 28.1±1.7   | 0.54±0.21  | 24.9±3.2        |
| FR <i>C. thermalis</i> | 50.3±4.7   | 4.61±1.29  | 26±3.3     | 3.27±0.88  | 24.3±5.1        |

289

290 Table S3. Average values ( $\pm$ s.d.) of the temperatures (T) and of the normalized amplitudes (Amp, in relative  
 291 units) of the thermoluminescence peaks from  $S_2Q_B^-$  and from  $S_2Q_A^-$  back-reactions, plotted in Fig. S5. The  
 292 difference in temperature between the  $S_2Q_B^-$  and the  $S_2Q_A^-$  ( $\Delta T$ ) is also reported. The  $\Delta T$  in *A. marina* is  
 293 significantly bigger than the one in WL and FR *C. thermalis* according to Student's t-test, as indicated with an  
 294 asterisk (\* $p \leq 0.05$ ).

295

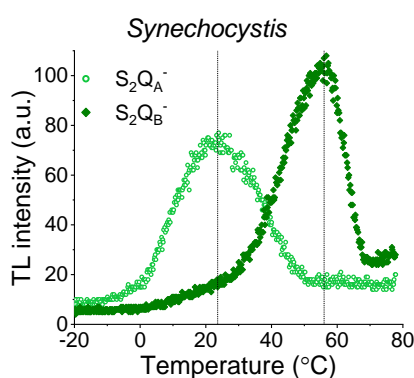

296

297 Fig. S6. Thermoluminescence measured in the absence of inhibitors ( $S_2Q_B^-$ ) or in the presence of DCMU ( $S_2Q_A^-$ )  
 298 in *Synechocystis* membranes. The dashed vertical lines indicate the two peak positions.

299 TL measurements were performed in *Synechocystis* membranes to compare the  $S_2Q_A^-$  (measured in  
 300 presence of DCMU) and  $S_2Q_B^-$  peak temperatures with those measured in the *A. marina* and *C.*  
 301 *thermalis* membranes under the same conditions. The TL peak temperatures in *Synechocystis* were  
 302 comparable with those in WL and FR *C. thermalis*, confirming that the  $S_2Q_A^-$  in Chl-d-PSII  
 303 recombines at a lower temperature than in Chl-a-PSII, as previously reported in cells (3), and in Chl-f-  
 304 PSII (Fig. 5 and S5).

305

### 306 **Supplementary material on luminescence decay (section 2.3 of main text)**

307 The  $S_2Q_A^-$  luminescence decay curves measured in *A. marina*, WL *C. thermalis* and FR *C. thermalis*  
 308 at 10, 20 and 30°C (Fig. S7) could be fitted with three exponential components (Table S4) and the  
 309 differences in the kinetics between samples and between temperatures could be ascribed to differences  
 310 in the amplitude and lifetimes of these components.

311 The luminescence decays at each temperature were similar in shape in Chl-a-PSII and Chl-f-PSII,  
 312 while they were markedly different in Chl-d-PSII. Chl-a-PSII and Chl-f-PSII had a fast decay phase  
 313 ( $T_1 \sim 0.5$  and  $\sim 1$  s, respectively) absent in Chl-d-PSII. This phase, that has a bigger amplitude in Chl-  
 314 a-PSII ( $\sim 60\%$ ) than in Chl-f-PSII ( $\sim 30\%$ ), is too fast to correspond to the  $S_2Q_A^-$  recombination and  
 315 appears to match the recombination rates for  $TyrZ'(H^+)Q_A^-$ , a reaction that dominates in centers  
 316 lacking the Mn cluster (17). The contribution of this fast component to the total luminescence  
 317 emission was no more than 10% in the case of WL *C. thermalis* and 5% for FR *C. thermalis*. This  
 318 decay phase was not detectable in the case of *A. marina*, suggesting that  $TyrZ'(H^+)Q_A^-$  recombination  
 319 might be too fast in Chl-d-PSII to appear in our measurements. In *A. marina* an additional slower  
 320 phase ( $\sim 40$ s) was present at  $10^\circ\text{C}$ , but the very low amplitude made its contribution to the overall  
 321 decay negligible.

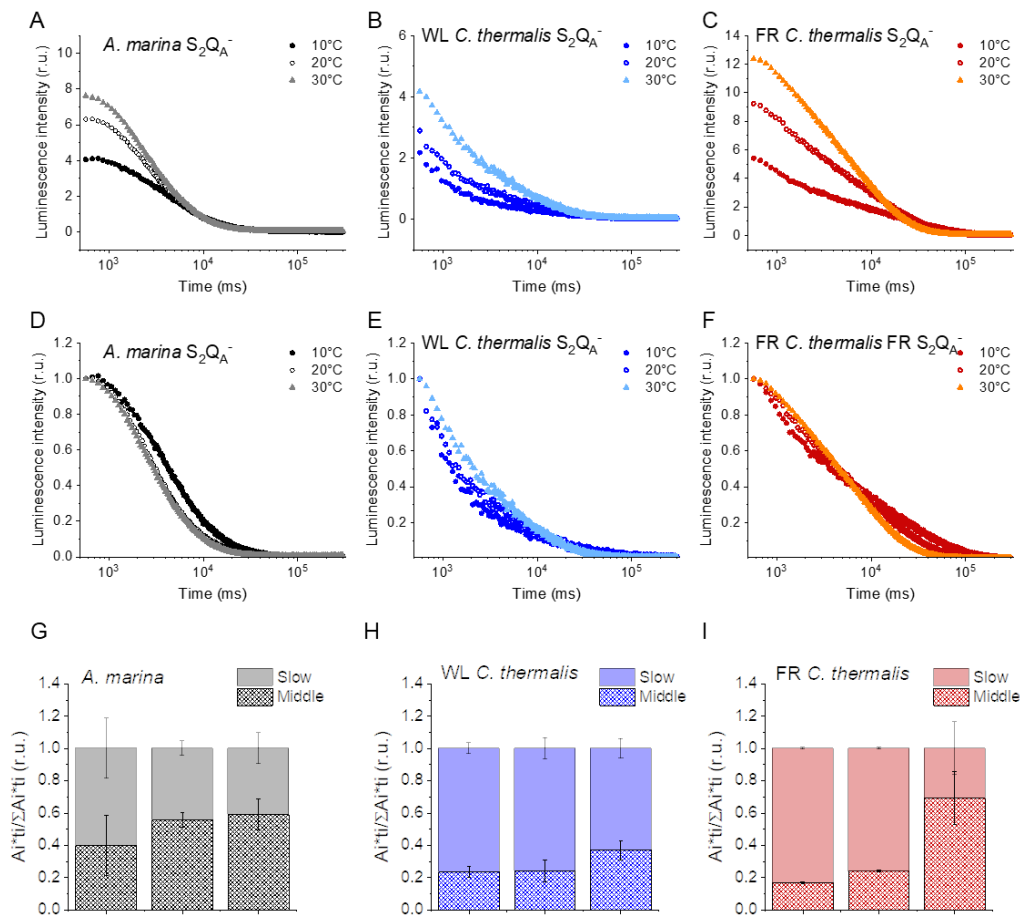

322  
 323 Fig. S7. (A, B and C) Representative  $S_2Q_A^-$  luminescence decay curves measured in *A. marina*, WL *C. thermalis*  
 324 and FR *C. thermalis* membranes in the presence of DCMU. The measurements were performed at 10, 20 and  
 325  $30^\circ\text{C}$ . The luminescence decays were measured for 300 s after the flash, and the time is plotted on a logarithmic  
 326 scale. (D, E and F) The same curves as in (A-C) after normalization on the initial intensities. (G, H and I) Relative  
 327 contributions of the middle and slow decay components to the total luminescence emission arising from  $S_2Q_A^-$   
 328 recombination, calculated using the values in Table S4.

329 The luminescence decay that we ascribe to the  $S_2Q_A^-$  back-reaction in the seconds to tens of seconds  
 330 timescale, is comprised of two decay components, designated the middle and slow phases in Table S4.  
 331 Both phases were faster in Chl-d-PSII (~3 and ~11 s) than in Chl-a-PSII (~4 and ~25 s), but slower in  
 332 Chl-f-PSII (~9 and ~39 s). In *A. marina* the lifetimes of these two decay components did not show a  
 333 significant temperature dependence, resulting in only a minor acceleration of the overall luminescence  
 334 decay of the Chl-d-PSII between 10 and 30°C (Fig. 5D). Indeed, the relative contribution of the two  
 335 decay phases to the total luminescence changed little in function of temperature in this sample (Fig.  
 336 S7G), with the changes being only at the level of the amplitude of the decay phases. The middle phase  
 337 lifetimes did not show a significant temperature dependence in WL and FR *C. thermalis* either, but  
 338 they were slower than in *A. marina*, especially in FR *C. thermalis*. The slow phase was also slower in  
 339 the two *C. thermalis* samples and, additionally, its decay accelerated with increasing temperature,  
 340 while its amplitude decreased. This resulted in its contribution to the overall luminescence decreasing  
 341 between 10 and 30°C (Fig. S7H and I) and the overall decay accelerating significantly (Fig. 5D),  
 342 especially in the FR *C. thermalis*.

343

| Strain and temperature        | Fast phase                | Middle phase              | Slow phase                         | Additional phase          |
|-------------------------------|---------------------------|---------------------------|------------------------------------|---------------------------|
|                               | T <sub>1</sub> /Amp (s/%) | T <sub>2</sub> /Amp (s/%) | T <sub>3</sub> /Amp (s/%)          | T <sub>4</sub> /Amp (s/%) |
| <b><i>A. marina</i></b>       |                           |                           |                                    |                           |
| 10°C                          | — / —                     | 3.5±1.0 / 64±22           | 10.6±2.9 / 35±18                   | 36.5±7.3 / 5±3            |
| 20°C                          | — / —                     | 3.2±0.6 / 88±5            | 12.7±2.9 / 18±3                    | — / —                     |
| 30°C                          | — / —                     | 3.0±0.4 / 87±9            | 10.2±2.4 / 19±7                    | — / —                     |
| <b>WL <i>C. thermalis</i></b> |                           |                           |                                    |                           |
| 10°C                          | 0.5±0.2 / 72±8            | 4.0±2.4 / 18±4            | 32.0±6.8 / 7±2                     | — / —                     |
| 20°C                          | 0.4±0.1 / 62±13           | 3.2±1.2 / 23±7            | 19.1±2.8 / 12±5                    | — / —                     |
| 30°C                          | 0.6±0.1 / 55±7            | 6.0±0.8 / 32±4            | 16.9 <sup>#</sup> / 9 <sup>#</sup> | — / —                     |
| <b>FR <i>C. thermalis</i></b> |                           |                           |                                    |                           |
| 10°C                          | 1.0±0.2 / 43±2            | 10.4±1.0 / 26±2           | 43.7±1.8 / 31±2                    | — / —                     |
| 20°C                          | 1.0±0.1 / 28±4            | 7.9±0.7 / 35±3            | 23.5±1.8 / 38±4                    | — / —                     |
| 30°C                          | 1.4±0.4 / 14±10           | 8.6±1.1 / 72±18           | 18.6±3.7 / 15±8                    | — / —                     |

344

345 Table S4. Time constants and relative amplitudes of the different phases of luminescence decay obtained by  
 346 fitting the data recorded at 10, 20 and 30°C with a three-exponential equation. The values represent the  
 347 averages of 3 biological replicates, ± s.d. The fast decay phase is assigned to TyrZ\*(H<sup>+</sup>)Q<sub>A</sub><sup>-</sup> recombination, while  
 348 the middle and slow phases are assigned to S<sub>2</sub>Q<sub>A</sub><sup>-</sup> recombination. The additional phase identified in *A. marina*  
 349 membranes at 10°C is unassigned. <sup>#</sup>The slow phase in WL *C. thermalis* membranes at 30°C could be reliably  
 350 fitted only in one replicate out of three.

351

352 It can be argued that the differences in kinetics between samples and their changes in function of  
353 temperature could represent changes in the relative contribution of different recombination pathways  
354 to the decay of  $S_2Q_A^-$ . It is not clear though whether each of the two decay components we identified  
355 represents a distinct recombination route or whether they derive from the combination of more  
356 complex kinetics. For instance, it has been suggested that the so-called “deactivation” luminescence  
357 should follow a hyperbolic decay, rather than an exponential decay, due to the progressive decrease in  
358 the concentration of  $S_2Q_A^-$  resulting in a progressive slowing down of the rates of the various  
359 recombination routes (18, 19). The data presented here could be satisfactorily fitted with exponentials  
360 but, given the considerations above and the uncertainty about how the evolution of luminescence  
361 reflects the actual concentrations of the charge separated states from which it originates, no  
362 assignment of the decay phase to specific recombination routes could be made.

363 Altogether, the data show that the luminescence kinetics in Chl-d-PSII are significantly different from  
364 those in Chl-a-PSII and Chl-f-PSII, pointing to a faster decay of the  $S_2Q_A^-$  charge separated state.

365 According to electron tunnelling calculations, the rate of  $P_{D1}^+Q_A^-$  direct recombination to ground ( $10^2$ -  
366  $10^3$  s<sup>-1</sup>) is much slower than  $P_{D1}^+Phe^-$  recombination to ground ( $10^6$ - $10^7$  s<sup>-1</sup>), although the limiting rate  
367 for  $S_2Q_A^-$  recombination via the repopulation of  $Phe^-$  is thought to be the migration of the electron  
368 hole from the Mn-cluster to TyrZ ( $\sim 10^3$  s<sup>-1</sup>) (20, 21). Although the temperature dependence of the  
369 recombination routes is complex, an increase in temperature would have no effect on the rate of  
370  $P_{D1}^+Q_A^-$  direct recombination to ground, but would increase the rate of the backwards electron transfer  
371 from  $Q_A^-$  to  $Phe$ , as this is thermally activated, following the relationship

$$372 \quad k_{rev} = k_{fwd} \cdot e^{-\frac{\Delta G^0}{k_B T}} \quad \text{Eq. 6}$$

373 where  $k_{rev}$  and  $k_{for}$  are the rate constants of the backward and forward electron transfer, respectively,  
374  $\Delta G$  is the energy gap between the two cofactors,  $k_B$  is the Boltzmann constant and  $T$  is the  
375 temperature. Note that the rates of back-transfer of the positive charge from the Mn-cluster to  $P_{D1}$  are  
376 also thermally activated and thus will accelerate with temperature and affect the rates of  
377 recombination from  $Phe^-$ . In this case, though, the smaller  $\Delta G$ s involved should result in a less  
378 pronounced temperature dependence compared to the back electron transfer from  $Q_A^-$  to  $Phe$   
379 (according to the equation above).

380 The acceleration of the luminescence decay kinetics with increasing temperature, observed for Chl-a-  
381 PSII and Chl-f-PSII, could reflect an increase in the contribution of  $S_2Q_A^-$  recombination route via  
382 repopulation of  $Phe^-$  in competition with the direct, non-radiative  $P_{D1}^+Q_A^-$  recombination route. In Chl-  
383 d-PSII, the lower temperature of the  $S_2Q_A^-$  recombination thermoluminescence peak (Fig. 5B and  
384 Table S3) suggests a smaller  $\Delta G$  between  $Q_A$  and  $Phe$ . This would result in a faster electron transfer  
385 from  $Q_A^-$  back to  $Phe$ , with this route already dominating the competition with the direct  $P_{D1}^+Q_A^-$

386 recombination to ground, with a consequently high luminescence yield and a small temperature  
387 sensitivity of the decay rates.

388

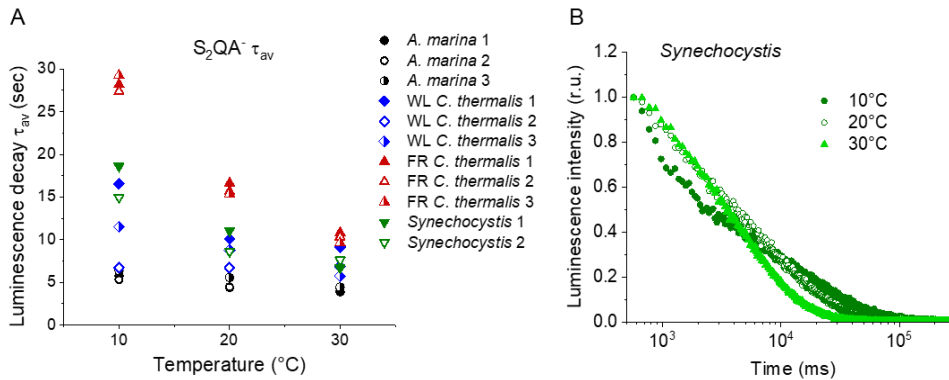

389

390 Fig. S8. (A) Plots of the average S<sub>2</sub>QA<sup>-</sup> luminescence decay lifetimes (τ<sub>av</sub>) in *A. marina*, *WL C. thermalis*, *FR C.*  
391 *thermalis* and *Synechocystis* membranes. Each series of data corresponds to an independent biological replicate.  
392 The *A. marina*, *WL C. thermalis* and *FR C. thermalis* datasets are those used to calculate the average decay  
393 values plotted in Fig. 5D. (B) Representative S<sub>2</sub>QA<sup>-</sup> luminescence decay curves measured in *Synechocystis*  
394 membranes at 10, 20 and 30°C, after normalization on the initial intensities. The luminescence decays were  
395 measured for 300 s after the flash and plotted on a logarithmic scale.

396

### 397 **Supplementary material on singlet oxygen production and sensitivity to high light in the far-red** 398 **PSII (section 2.4 of main text)**

#### 399 *Light sources*

400 Given the different pigments involved in light capture in the three types of PSII studied here, the  
401 comparability of experiments could be adversely affected by differences in excitation rates due to the  
402 degree of matching of the absorption spectrum of the PSII with excitation spectrum of the light  
403 sources used. Fig. S9A shows absorption spectra of the three membrane preparations containing the 3  
404 types of PSII and shows the spectral profiles of the xenon lamp and the 660 nm LED. For both light  
405 sources the WL and the FR *C. thermalis* samples have a greater spectral overlap with the actinic light  
406 spectrum, than does the *A. marina* sample. It can be concluded that under identical illumination  
407 conditions, *A. marina* would receive less photons during a period of illumination compared to two *C.*  
408 *thermalis* samples.

409 Fig. S9B shows the oxygen evolution in the presence of the electron acceptor system, and oxygen  
410 consumption rates in the presence of histidine measured in *A. marina* membranes as a function of the  
411 light intensity. The figure shows experiments done in three biological replicates. Both rates showed a  
412 comparable dependence on light intensity and saturated at 7100 μmol photons m<sup>-2</sup> s<sup>-1</sup>, the intensity



413 used in all the oxygen measurements. The same light intensity was saturating also in the case of WL  
 414 and FR *C. thermalis* membranes used at the same concentration of 5  $\mu\text{g Chl ml}^{-1}$  (Fig. S9C).

415 Fig. S9D and E show that both the LED and the xenon lamp gave the same rates of  $\text{O}_2$  evolution, and  
 416 given their different actinic spectra, this indicates that both were saturating under the conditions of the  
 417 experiment.

418

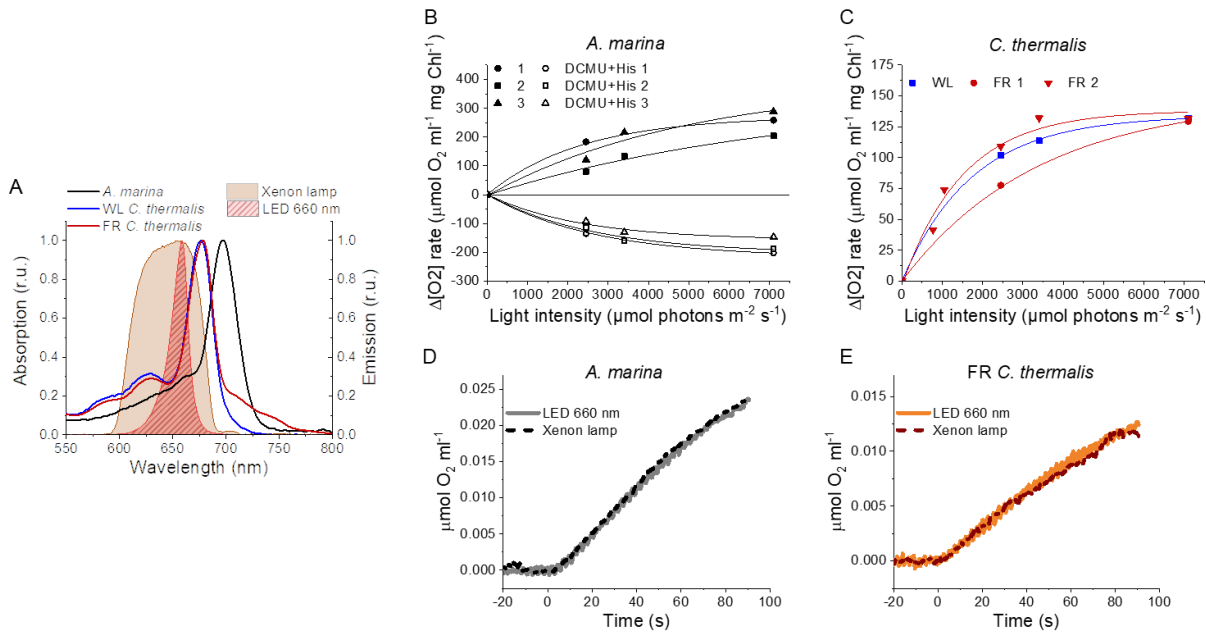

419

420 Fig. S9. Light sources used for  $^1\text{O}_2$  production measurements and high light treatment. (A) Absorption spectra  
 421 (normalized on the maximal absorption in the Qy region) of *A. marina*, WL *C. thermalis* and FR *C. thermalis*  
 422 membranes and spectral profiles (normalized on the maximal emission) of the 660 nm LED and xenon lamp  
 423 used. (B) Light saturation curves of  $\text{O}_2$  evolution (in presence of DCBQ and ferricyanide, solid symbols) and  $^1\text{O}_2$   
 424 production (in the presence of DCMU and histidine, open symbols) in three biological replicates of *A. marina*  
 425 membranes, using the xenon lamp. The intensity of the lamp was decreased by using neutral filters. (C) Light  
 426 saturation curves of  $\text{O}_2$  evolution in WL *C. thermalis* (1 biological replicate) and FR *C. thermalis* (2 biological  
 427 replicates) membranes, used at a final Chl concentration of 5  $\mu\text{g ml}^{-1}$ . (D and E) Representative  $\text{O}_2$  electrode  
 428 traces monitoring maximal  $\text{O}_2$  evolution in *A. marina* and FR *C. thermalis* membranes, used at a final Chl  
 429 concentration of 5  $\mu\text{g ml}^{-1}$ . Measurements were performed in presence of DCBQ and potassium ferricyanide  
 430 using either the 660 nm LED (2600  $\mu\text{mol photons m}^{-2} \text{ s}^{-1}$ ) or the xenon lamp (7100  $\mu\text{mol photons m}^{-2} \text{ s}^{-1}$ ) for  
 431 illumination.

432

433

434

435 *Singlet oxygen production in membranes*

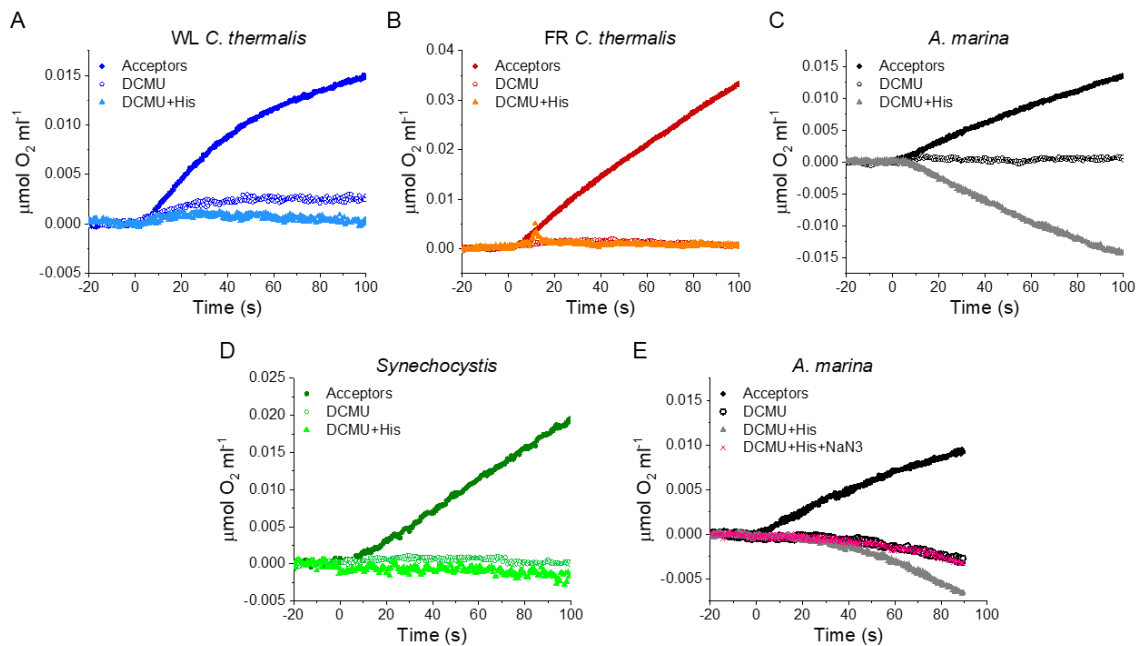

436

437 Fig. S10. Singlet oxygen production in *A. marina*, WL *C. thermalis*, FR *C. thermalis* and *Synechocystis* membranes.  
 438 All samples were used at a chlorophyll concentration of 5  $\mu\text{g ml}^{-1}$ . (A, B, C and D) Representative  $\text{O}_2$  electrode  
 439 traces monitoring  $\text{O}_2$  evolution and uptake.  $^1\text{O}_2$  production in presence of DCMU was measured as the rate of  
 440 histidine-dependent consumption of  $\text{O}_2$  induced by saturating illumination (xenon lamp, 7100  $\mu\text{mol photons m}^{-2}$   
 441  $\text{s}^{-1}$ ). Measurements were performed in presence of DCBQ and ferricyanide (Acceptors), or in presence of  
 442 DCMU, with or without the addition of histidine (His). (E)  $^1\text{O}_2$  production in a different *A. marina* membrane  
 443 preparation showing the effect of sodium azide ( $\text{NaN}_3$ ). Sodium azide is a  $^1\text{O}_2$  quencher that regenerates  $\text{O}_2$  in  
 444 competition with  $^1\text{O}_2$  scavenging by histidine.

445

446 *Singlet oxygen production experiments: the presence of the Mn cluster.*

447 To test whether the  $^1\text{O}_2$  production in *A. marina* was related to the fraction of PSII centers devoid of  
 448 an intact Mn-cluster, which is the most obvious functional difference between *A. marina* membrane  
 449 samples and those from the WL and FR *C. thermalis*, we compared  $^1\text{O}_2$  formation in untreated and  
 450 Tris-washed membranes. Tris-washing was used to remove the Mn-cluster from all PSII. As shown in  
 451 Fig. S11, the Tris-washed membranes did not display any  $\text{O}_2$  evolution activity in presence of the  
 452 acceptors DCBQ and potassium ferricyanide but retained the same  $^1\text{O}_2$  production capacity as the  
 453 untreated sample. This indicates that  $^1\text{O}_2$  formation in *A. marina* is not related to the fraction of  
 454 centers that are capable of water oxidation.

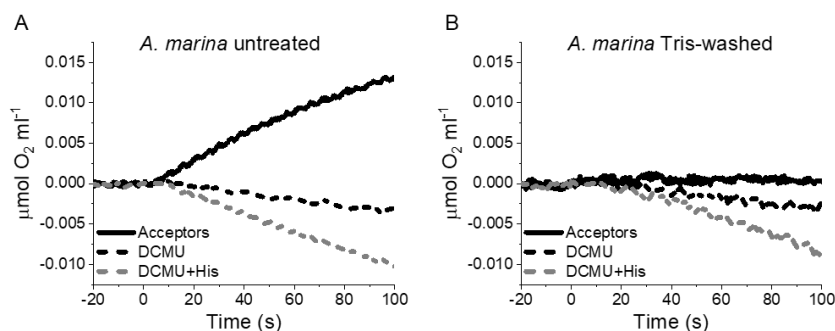

455

456 Fig. S11.  $^1\text{O}_2$  formation in presence of DCMU measured as the rate of histidine-dependent consumption of  $\text{O}_2$   
 457 induced by saturating illumination in untreated (A) and Tris-washed (B) *A. marina* membranes. Measurements  
 458 were performed in the presence of DCBQ and potassium ferricyanide (Acceptors) or in presence of DCMU, with  
 459 or without the addition of L-Histidine (His).

460

461 *Singlet oxygen production: does PSI contribute to  $\text{O}_2$  uptake?*

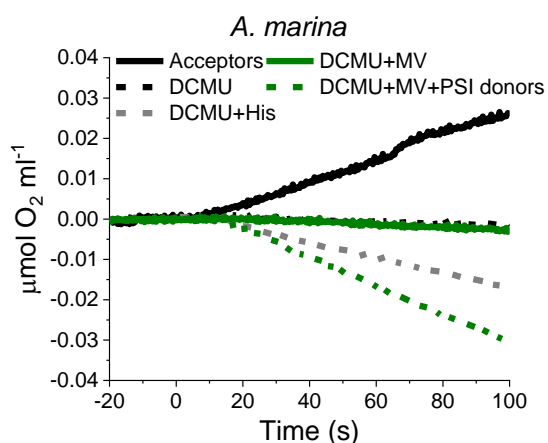

462

463 Fig. S12.  $\text{O}_2$  electrode traces monitoring  $\text{O}_2$  evolution and uptake in *A. marina* membranes;  $^1\text{O}_2$  formation is  
 464 monitored by  $\text{O}_2$ -uptake due to  $^1\text{O}_2$  scavenging by histidine. Measurements were performed in the presence of  
 465 DCBQ and potassium ferricyanide (Acceptors) or in the presence of DCMU, with or without the addition of L-  
 466 Histidine (His). PSI activity (green traces) was measured as the rate of methyl viologen (MV, 100  $\mu\text{M}$ )-dependent  
 467 oxygen consumption in the presence of DCMU, either with (dashed green line) or without (solid green line, "PSI  
 468 donors") the electron donors ascorbate (5 mM) and TMPD (50  $\mu\text{M}$ ).

469 We tested whether light-induced oxygen consumption observed in *A. marina* membranes could be  
 470 derived from Photosystem I (PSI) turnover. It is well-known that PSI can reduce  $\text{O}_2$  to  $\text{O}_2^{\cdot-}$  and this is  
 471 greatly enhanced by methyl viologen (MV) acting as a redox mediator. The PSI electron donors,  
 472 plastocyanin or cytochrome  $c_6$ , which are both soluble in the lumen, are expected to be lost during  
 473 preparation of the membranes. As a result, illumination is likely to accumulate oxidized  $\text{P}_{700}$  resulting  
 474 in PSI being non-functional. To confirm this in *A. marina* membranes in which PSII activity was

475 blocked by DCMU, we tested whether methyl viologen (MV) could induce a light-dependent oxygen  
 476 consumption in the absence of the histidine  $^1\text{O}_2$  trap. In isolated *A. marina* membranes, no MV-  
 477 mediated oxygen consumption was observed in presence of DCMU unless the exogenous PSI electron  
 478 donors, ascorbate and TMPD, were also added (Fig. S12). This demonstrates that under the conditions  
 479 of the experiments used to estimate  $^1\text{O}_2$  trapping by histidine in the isolated *A. marina* membranes,  
 480 there was no contribution from PSI activity.

481

482 *Singlet oxygen production in cells*

483 We tested if differences in the stability of the membrane samples could explain the marked increase in  
 484 singlet oxygen production in *A. marina* compared to both the WL and FR the *C. thermalis* samples  
 485 (see Fig. 6 and related text). Lower stability of PSII in the isolated membranes of *A. marina* was  
 486 suggested by the presence of long-lived non-decaying emission observed when measuring  
 487 fluorescence decay kinetics (Fig. 2 and S1) and attributed to a fraction of centers devoid of an intact  
 488 Mn-cluster. We therefore used the histidine trapping method to compare the rates of singlet oxygen  
 489 production in *A. marina* and FR *C. thermalis* intact cells. The reliability of the His-trapping method to  
 490 monitor  $^1\text{O}_2$  production in intact cyanobacterial cells has been previously demonstrated (22).

491

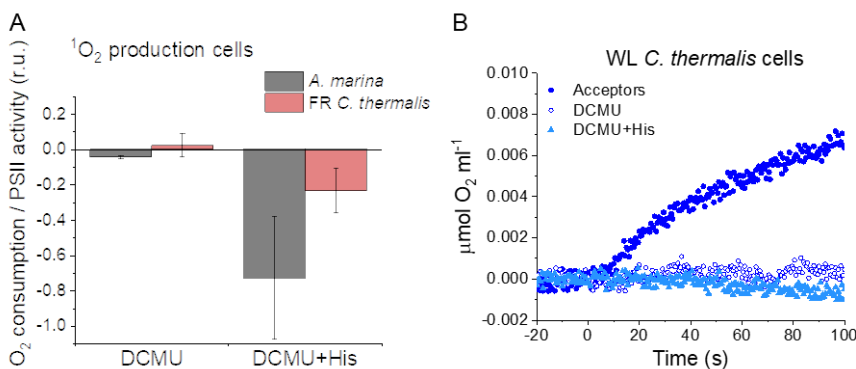

492 Fig. S13. Singlet oxygen production in intact cells. (A)  $^1\text{O}_2$  formation in presence of DCMU measured as the rate  
 493 of histidine-dependent consumption of  $\text{O}_2$  induced by saturating illumination in *A. marina* and FR *C. thermalis*  
 494 cells. The data are averages ( $\pm$ s.d.) of 3 biological replicates for each strain. For each replicate, the rates of  
 495 oxygen consumption were normalized to the maximal oxygen evolution rates obtained with the same  
 496 illumination in the presence of the exogenous acceptors, DCBQ and ferricyanide. (B)  $\text{O}_2$  electrode traces  
 497 monitoring  $\text{O}_2$  evolution and uptake in WL *C. thermalis* cells.  $^1\text{O}_2$  production in the presence of DCMU was  
 498 measured as the rate of histidine-dependent consumption of  $\text{O}_2$  induced by saturating illumination (xenon lamp,  
 499  $7100 \mu\text{mol photons m}^{-2} \text{ s}^{-1}$ ). Measurements were performed in the presence of DCBQ and ferricyanide  
 500 (Acceptors), or in the presence of DCMU, with or without the addition of histidine (His).

501 Fig. S13A shows that in *A. marina* cells the rate of histidine-mediated oxygen uptake was much  
 502 higher, relative to the maximal oxygen evolution rate, than in FR *C. thermalis*. The values obtained in

503 cells were comparable with those obtained in isolated membranes, despite variability between  
 504 biological replicates (this variability makes the difference between the two strains less significant than  
 505 that measured in membranes,  $p = 0.08$ ). Like FR *C. thermalis* cells, WL *C. thermalis* cells also  
 506 showed low levels of  $^1\text{O}_2$  production, similar to those measured in the respective membranes (Fig.  
 507 S13B). It is of note that both in membranes and intact cells, the rates of maximal  $\text{O}_2$  evolution  
 508 (measured in presence of exogenous electron acceptors) and of  $^1\text{O}_2$  production (measured in presence  
 509 of DCMU) do not depend on the functionality of the electron transport chain downstream of PSII.

510

511 **Supplementary material on the D1-Q130E occurrence in different species (section 3.2 of main**  
 512 **text)**

A

|                       |     |                                    |     |
|-----------------------|-----|------------------------------------|-----|
| <i>T. elong</i> PsbA1 | 110 | GPYQLIIFHFLGASCYMGREWELSYRLGMRPWI  | 143 |
| <i>T. elong</i> PsbA3 | 110 | GPYQLIIFHFLIGVFCYMGREWELSYRLGMRPWI | 143 |
| <i>C. therm</i> FR    | 111 | GPYQMIGFHYIPALCCYAGREWELSYRLGMRPWI | 144 |
| <i>C. therm</i> WL1   | 110 | GPYQLVIFHFLIGFCYMGREWELSYRLGMRPWI  | 143 |
| <i>C. therm</i> WL2   | 110 | GPYQLVIFHFLIGVFCYMGREWELSYRLGMRPWI | 143 |
| <i>C. therm</i> WL3   | 110 | GPYQLVIFHFLIGVFCYMGREWELSYRLGMRPWI | 143 |
| <i>A. marin</i> 1     | 113 | GPYQLIILHFLIAIWTYLGREWELSYRLGMRPWI | 146 |
| <i>A. marin</i> 2     | 110 | GPYQLIIFHYMIGCICYLGRQWEYSYRLGMRPWI | 143 |
| <i>A. marin</i> 3     | 110 | GPYQLIIFHYMIGCICYLGRQWEYSYRLGMRPWI | 143 |

B

|                    |     |                                    |     |
|--------------------|-----|------------------------------------|-----|
| Leptol JSC-1       | 110 | GPYQMIAAHYVPALCCYMGREWELSYRLGMRPWI | 143 |
| Oscill JSC-12      | 111 | GPYQMIGAHYIPALACYMGREWELSYRLGMRPWI | 144 |
| Caloth NIES-267    | 110 | GPYQMIAFHYIPALSCYMGREWELSYRLGMRPWI | 143 |
| Mastigo BC008      | 111 | GPYQMIAFHYIPALACYMGREWELSYRLGMRPWI | 144 |
| <i>C. therm</i> FR | 111 | GPYQMIGFHYIPALCCYAGREWELSYRLGMRPWI | 144 |
| Caloth PCC7507     | 111 | GPYQMIAFHYIPALSCYMGREWELSYRLGMRPWI | 144 |
| Caloth NIES-3974   | 111 | GPYQMIAFHYIPALACYMGREWELSYRLGMRPWI | 144 |
| Fische NIES-592    | 111 | GPYQMIGFHYIPALACYMGREWELSYRLGMRPWI | 144 |
| Fische NIES-3754   | 111 | GPYQMIGFHYIPALACYMGREWELSYRLGMRPWI | 144 |
| Mastigo SAG4.84    | 111 | GPYQMIGFHYIPALACYMGREWELSYRLGMRPWI | 144 |
| Chlorog PCC6912    | 111 | GPYQMIGFHYIPALACYMGREWELSYRLGMRPWI | 144 |
| Fische PCC9605     | 111 | GPYQMIGFHYIPALACYMGREWELSYRLGMRPWI | 144 |
| Halomicr. Hongd.   | 110 | GPYQMIAFHYIPALLCYMGREWELSYRLGMRPWI | 143 |
| Synechoco PCC7335  | 109 | GPYQMIAFHYIPALLCYLGRWELSYRLGMRPWI  | 142 |
| Pleuroc CCALA161   | 110 | GPYQMIAFHYIPALCCYLGRWELSYRLGMRPWI  | 143 |
| Hydroco NIES-593   | 110 | GPYQMIALHYVPALCCYLGRWELSYRLGMRPWI  | 143 |
| Pleuroc PCC7327    | 110 | GPYQMIALHYVPALCCYLGRWELSYRLGMRPWI  | 143 |

513

514 Fig. S14. Occurrence of the high light-associated D1-Gln130Glu substitution in the different types of PSII. (A)  
 515 Multi-alignment of the D1 proteins of *T. elongatus*, *C. thermalis* and *A. marina*. (B) Multi-alignment of the far-  
 516 red light induced D1 isoforms of *C. thermalis* and other Chl-f species. Both alignments were done using Clustal  
 517 Omega (23), the sequences were retrieved from the KEGG (<https://www.kegg.jp/>) and NCBI  
 518 (<https://www.ncbi.nlm.nih.gov/>) databases. For each alignment only a 33 amino acid region is shown, the start  
 519 and end positions with respect to each full sequence are indicated with numbers. The Q130E substitution is  
 520 highlighted as white font on black background. The far-red D1 sequence from *C. thermalis* is framed in red.

521 The high light induced D1 isoform of *T. elongatus*, PsbA3, contains a glutamate in position 130, in  
 522 place of the glutamine that is present in the isoform normally expressed under low-light conditions,

523 PsbA1. The glutamate forms a stronger H-bond with Phe<sub>D1</sub>, thus increasing its redox potential. This  
 524 substitution is present also in high-light-induced D1 isoforms of other cyanobacterial species, and is  
 525 associated with photoprotection (24).

526 The multi-alignment in Fig. S14A shows that the same Q→E substitution is present also in the far-red  
 527 light-induced D1 isoform of *C. thermalis* (*C. therm* FR) and in two out of three of its non-far-red  
 528 induced D1 isoforms (*C. therm* WL2 and 3) but is not present in any of the three D1 isoforms of *A.*  
 529 *marina*. To date, we have not yet investigated which D1 isoform is expressed in *C. thermalis* in our  
 530 white light growth conditions.

531 The presence of E130 is conserved in the far-red light induced D1 isoforms of most of the  
 532 cyanobacteria species capable of far-red light photo-acclimation (Fig. S14B).

533

534 **Supplementary material for section 3.3 of main text**

| <b>Chl-a-PSII</b>                  |     |    |              |
|------------------------------------|-----|----|--------------|
| State                              | E*  | n  | Pi           |
| Bulk Chl-a/Pheo-a                  | 685 | 34 | 0.878        |
| Chl <sub>D1680</sub>               | 685 | 1  | <b>0.026</b> |
| F <sub>685</sub>                   | 685 | 1  | 0.026        |
| F <sub>695</sub>                   | 695 | 1  | 0.071        |
| <b>Chl-d-PSII</b>                  |     |    |              |
| State                              | E*  | n  | Pi           |
| Chl-a/Pheo-a                       | 685 | 3  | 0.002        |
| Chl <sub>D1720</sub>               | 725 | 1  | <b>0.029</b> |
| Bulk Chl-d                         | 725 | 33 | 0.969        |
| <b>Chl-f-PSII</b>                  |     |    |              |
| State                              | E*  | n  | Pi           |
| Bulk Chl-a/Pheo-a                  | 685 | 32 | 0.046        |
| Chl <sub>D1721</sub>               | 726 | 1  | <b>0.075</b> |
| F <sub>720</sub> /A <sub>715</sub> | 720 | 1  | 0.043        |
| F <sub>731</sub> /A <sub>726</sub> | 731 | 1  | 0.117        |
| F <sub>737</sub> /A <sub>732</sub> | 737 | 1  | 0.2          |
| F <sub>748</sub> /A <sub>743</sub> | 748 | 1  | 0.52         |

535

536 Table S5. Excitation energy partitions calculated for the three types of PSII assuming excitation equilibration  
 537 between the pigments. E\* denotes the energy of the excited state, obtained by applying a +5 nm Stoke's shift to  
 538 the absorption of the pigments, n is the number of pigments belonging to each state and Pi is the normalized  
 539 partition of the excited states, calculated following Boltzmann distribution (25).

540 The states are denoted as follows: Chl<sub>D1</sub> is the primary donor (Pi highlighted in bold), Bulk indicates the antenna  
 541 pigments considered as isoenergetic, and F indicates the antenna pigments considered separately from the  
 542 bulk, with the fluorescence emission wavelength indicated. In the case of the far-red pigments in Chl-f-PSII the  
 543 peak absorptions (A) are also indicated, as taken from (26).

544 **References**

- 545 1. A. R. Crofts, C. A. Wraight, The electrochemical domain of photosynthesis. *Biochim. Biophys.*  
546 *Acta - Rev. Bioenerg.* **726**, 149–185 (1983) doi:10.1016/0304-4173(83)90004-6.
- 547 2. I. Vass, D. Kirilovsky, A.-L. Etienne, UV-B Radiation-Induced Donor- and Acceptor-Side  
548 Modifications of Photosystem II in the Cyanobacterium *Synechocystis* sp. PCC 6803.  
549 *Biochemistry* **38**, 12786–12794 (1999) doi:10.1021/bi991094w.
- 550 3. K. Cser, Z. Deák, A. Telfer, J. Barber, I. Vass, Energetics of Photosystem II charge  
551 recombination in *Acaryochloris marina* studied by thermoluminescence and flash-induced  
552 chlorophyll fluorescence measurements. *Photosynth. Res.* **98**, 131–140 (2008)  
553 doi:10.1007/s1120-008-9373-3.
- 554 4. K. Cser, I. Vass, Radiative and non-radiative charge recombination pathways in Photosystem  
555 II studied by thermoluminescence and chlorophyll fluorescence in the cyanobacterium  
556 *Synechocystis* 6803. *Biochim. Biophys. Acta - Bioenerg.* **1767**, 233–243 (2007)  
557 doi:10.1016/j.bbabi.2007.01.022.
- 558 5. K. Cser, Z. Deák, A. Telfer, J. Barber, I. Vass, Energetics of Photosystem II charge  
559 recombination in *Acaryochloris marina* studied by thermoluminescence and flash-induced  
560 chlorophyll fluorescence measurements. *Photosynth. Res.* **98**, 131–140 (2008)  
561 doi:10.1007/s1120-008-9373-3.
- 562 6. B. Diner, P. Joliot, Effect of the transmembrane electric field on the photochemical and  
563 quenching properties of Photosystem II in vivo. *Biochim. Biophys. Acta - Bioenerg.* **423**, 479–  
564 498 (1976) doi:10.1016/0005-2728(76)90202-4.
- 565 7. P. Joliot, A. Joliot, Dependence of Delayed Luminescence upon Adenosine Triphosphatase  
566 Activity in *Chlorella*. *Plant Physiol.* **65**, 691–696 (1980) doi:10.1104/pp.65.4.691.
- 567 8. A. W. Rutherford, A. R. Crofts, Y. Inoue, Thermoluminescence as a probe of Photosystem II  
568 photochemistry. The origin of the flash-induced glow peaks. *Biochim. Biophys. Acta -*  
569 *Bioenerg.* **682**, 457–465 (1982) doi:10.1016/0005-2728(82)90061-5.
- 570 9. A. Boussac, *et al.*, Biosynthetic Ca<sup>2+</sup>/Sr<sup>2+</sup> exchange in the photosystem II oxygen-evolving  
571 enzyme of *Thermosynechococcus elongatus*. *J. Biol. Chem.* **279**, 22809–22819 (2004)  
572 doi:10.1074/jbc.M401677200.
- 573 10. J. Lavorel, Matrix analysis of the oxygen evolving system of photosynthesis. *J. Theor. Biol.*  
574 **57**, 171–185 (1976) doi:10.1016/S0022-5193(76)80011-2.
- 575 11. J. Lavergne, Improved UV-visible spectra of the S-transitions in the photosynthetic oxygen-  
576 evolving system. *Biochim. Biophys. Acta - Bioenerg.* **1060**, 175–188 (1991)  
577 doi:10.1016/S0005-2728(09)91005-2.
- 578 12. S. Styring, A. W. Rutherford, In the oxygen-evolving complex of photosystem II the S<sub>0</sub> state  
579 is oxidized to the S<sub>1</sub> state by D<sup>+</sup> (signal II<sub>slow</sub>). *Biochemistry* **26**, 2401–2405 (1987)  
580 doi:10.1021/bi00383a001.
- 581 13. B. R. Velthuys, J. W. M. Visser, The reactivation of EPR signal II in chloroplasts treated with  
582 reduced dichlorophenol-indophenol: Evidence against a dark equilibrium between two  
583 oxidation states of the oxygen evolving system. *FEBS Lett.* **55**, 109–112 (1975)  
584 doi:10.1016/0014-5793(75)80971-9.
- 585 14. W. F. J. Vermaas, G. Renger, G. Dohnt, The reduction of the oxygen-evolving system in  
586 chloroplasts by thylakoid components. *Biochim. Biophys. Acta - Bioenerg.* **764**, 194–202  
587 (1984) doi:10.1016/0005-2728(84)90028-8.
- 588 15. M. Sugiura, *et al.*, Site-directed mutagenesis of *Thermosynechococcus elongatus* photosystem

- 589 II: The O<sub>2</sub>-evolving enzyme lacking the redox-active tyrosine D. *Biochemistry* **43**, 13549–  
590 13563 (2004) doi:10.1021/bi048732h.
- 591 16. D. J. Nürnberg, *et al.*, Photochemistry beyond the red limit in chlorophyll f-containing  
592 photosystems. *Science* (80-. ). **360**, 1210–1213 (2018) doi:10.1126/science.aar8313.
- 593 17. C. T. Yerkes, G. T. Babcock, A. R. Crofts, A Tris-induced change in the midpoint potential of  
594 Z, the donor to photosystem II, as determined by the kinetics of the back reaction. *FEBS Lett.*  
595 **158**, 359–363 (1983) doi:10.1016/0014-5793(83)80613-9.
- 596 18. J. Lavorel, J.-M. Dennery, The slow component of Photosystem II luminescence. A process  
597 with distributed rate constant? *Biochim. Biophys. Acta - Bioenerg.* **680**, 281–289 (1982)  
598 doi:10.1016/0005-2728(82)90140-2.
- 599 19. E. Tyystjarvi, I. Vass, “Light Emission as a Probe of Charge Separation and Recombination in  
600 the Photosynthetic Apparatus: Relation of Prompt Fluorescence to Delayed Light Emission  
601 and Thermoluminescence” in *Chlorophyll a Fluorescence*, (Springer Netherlands, 2007), pp.  
602 363–388 doi:10.1007/978-1-4020-3218-9\_13.
- 603 20. C. C. Moser, C. C. Page, P. Leslie Dutton, Tunneling in PSII. *Photochem. Photobiol. Sci.* **4**,  
604 933–939 (2005) doi:10.1039/b507352a.
- 605 21. M. Sugiura, *et al.*, Modification of the pheophytin redox potential in *Thermosynechococcus*  
606 *elongatus* Photosystem II with PsbA3 as D1. *Biochim. Biophys. Acta - Bioenerg.* **1837**, 139–  
607 148 (2014) doi:10.1016/j.bbabi.2013.09.009.
- 608 22. A. U. Rehman, K. Cser, L. Sass, I. Vass, Characterization of singlet oxygen production and its  
609 involvement in photodamage of Photosystem II in the cyanobacterium *Synechocystis* PCC  
610 6803 by histidine-mediated chemical trapping. *Biochim. Biophys. Acta - Bioenerg.* **1827**, 689–  
611 698 (2013) doi:10.1016/j.bbabi.2013.02.016.
- 612 23. F. Sievers, *et al.*, Fast, scalable generation of high-quality protein multiple sequence  
613 alignments using Clustal Omega. *Mol. Syst. Biol.* **7** (2011) doi:10.1038/msb.2011.75.
- 614 24. M. Sugiura, *et al.*, Energetics in Photosystem II from *Thermosynechococcus elongatus* with a  
615 D1 protein encoded by either the psbA1 or psbA3 gene. *Biochim. Biophys. Acta - Bioenerg.*  
616 **1797**, 1491–1499 (2010) doi:10.1016/j.bbabi.2010.03.022.
- 617 25. P. D. Laible, W. Zipfel, T. G. Owens, Excited state dynamics in chlorophyll-based antennae:  
618 the role of transfer equilibrium. *Biophys. J.* **66**, 844–860 (1994) doi:10.1016/S0006-  
619 3495(94)80861-6.
- 620 26. M. Judd, *et al.*, The primary donor of far-red photosystem II: ChlD1 or PD2? *Biochim.*  
621 *Biophys. Acta - Bioenerg.* **1861**, 148248 (2020) doi:10.1016/j.bbabi.2020.148248.
- 622
